1  
2  
3  
4  
5  
6  
7  
8  
9  
10  
11  
12  
13  
14  
15  
16  
17  
18  
19  
20  
21  
22  
23  
24  
25  
26

## Fatherhood alters gene expression within the MPOA

Adele M. H. Seelke<sup>1</sup>, Jessica M. Bond<sup>1</sup>, Trent C. Simmons<sup>1</sup>, Nikhil Joshi<sup>2</sup>, Matthew L. Settles<sup>2</sup>, Danielle Stolzenberg<sup>1</sup>, Mijke Rhemtulla<sup>1</sup>, and Karen L. Bales<sup>1,3</sup>

1. Department of Psychology, University of California, Davis
2. Bioinformatics Core Facility, University of California, Davis
3. California National Primate Research Center, University of California, Davis

**Running Title:** Fatherhood alters gene expression within the MPOA

**Key Words:** Prairie vole, monogamy, biparental care, paternal behavior, RNA sequencing

**Corresponding Author:** Adele M.H. Seelke

Address: Department of Psychology, University of California, Davis, Davis, CA 95616

Telephone: 530-752-0668

Fax: 530-752-2087

Email: [amseelke@ucdavis.edu](mailto:amseelke@ucdavis.edu)

**Declarations of Interest:** none

1 **Abstract:**

2 Female parenting is obligate in mammals, but fathering behavior among mammals is rare.  
3 Only 3-5% of mammalian species exhibit biparental care, including humans, and  
4 mechanisms of fathering behavior remain sparsely studied. However, in species where it  
5 does exist, paternal care is often crucial to the survivorship of offspring. The present  
6 study is the first to identify new gene targets linked to the experience of fathering  
7 behavior in a biparental species using RNA sequencing. In order to determine the pattern  
8 of gene expression within the medial preoptic area that is specifically associated with  
9 fathering behavior, we identified differentially expressed genes in male prairie voles  
10 (*Microtus ochrogaster*) that experienced one of three social conditions: virgin males, pair  
11 bonded males, and males with fathering experience. Differentially expressed genes from  
12 each comparison (i.e., Virgin vs Paired, Virgin vs Fathers, and Paired vs Fathers) were  
13 evaluated using the Gene Ontology enrichment analysis, and Kegg pathways analysis to  
14 reveal metabolic pathways associated with specific differentially expressed genes. Using  
15 these tools, we identified a group of genes that are differentially expressed in voles with  
16 different amounts of social experience. These genes are involved in a variety of  
17 processes, with particular enrichment in genes associated with immune function,  
18 metabolism, synaptic plasticity, and the remodeling of dendritic spines. The identification  
19 of these genes and processes will lead to novel insights into the biological basis of  
20 fathering behavior.

21

22 **Keywords:** fathering, dendritic spines, plasticity, gene expression, RNA sequencing,  
23 parenting

1 **1. Introduction:**

2 Biparental care, where both mother and father contribute to the care of the  
3 offspring, is displayed by a minority of mammalian species – usually cited as 3-5%  
4 (Kleiman, 1977; Lukas and Clutton-Brock, 2013; Opie et al., 2013). Female parenting is  
5 obligate because mammalian offspring need to nurse. Therefore, the presence of the  
6 male, and particularly active participation of the male in fathering, is an unusual situation  
7 seen only in our own and a limited number of other mammalian species (Gubernick and  
8 Alberts, 1987; Mendoza and Mason, 1997; Runcie, 2000; Thomas and Birney, 1979;  
9 Wynne-Edwards and Timonin, 2007). In species where it does exist, including humans,  
10 paternal care is often crucial to the survivorship of offspring, or at the least has significant  
11 and long-term impacts on growth as well as neural, reproductive and social development  
12 (Bales and Saltzman, 2016; Cantoni and Brown, 1997); however little is known about the  
13 specific neurobiological regulation of paternal care (Wynne-Edwards and Timonin,  
14 2007). The vast majority of parenting research focuses on the mother, while the role of  
15 the father is mostly considered in the context of paternal absence (Bales and Saltzman,  
16 2016). Considering paternal care through the absence of the father in a biparental species  
17 has drawbacks, however, since it is impossible to distinguish between the influence of the  
18 quantitative absence of another caregiving individual and the qualitative absence of the  
19 father in particular.

20 However, paternal absence is the most extreme situation. Although less studied,  
21 individual variation in fathering can also have long-term effects on offspring (Bales and  
22 Saltzman, 2016), and in the context of non-human mammals is always carried out in a  
23 biparental care situation. In prairie voles, we have shown that natural variation in

1 biparental parenting behavior predicts pup development and juvenile social behavior  
2 (Perkeybile et al., 2013), exploratory behavior and pair-bonding, and adult aggression  
3 and stress responses (Arias Del Razo and Bales, 2016; Perkeybile and Bales, 2015a;  
4 Perkeybile and Bales, 2015b). It is not always possible in a biparental care situation to  
5 tell what outcomes in offspring are due to maternal care and what are due to paternal  
6 care. However, some very interesting roles for the father have been observed. For  
7 instance, in some species, males may compensate for poor maternal care (or allow  
8 mothers to expend less energy on non-nutritive tasks like carrying)(Bales et al., 2002;  
9 Perkeybile et al., 2013); or a paternal behavior such as retrievals (carrying pups back to  
10 the nest or territory) may be directly linked to offspring display of retrievals and  
11 aggression as an adult (Bester-Meredith and Marler, 2003; Frazier et al., 2007).

12         While little is known about the effects of paternal care on offspring, especially  
13 when compared to maternal care, even less is known about the neural mechanisms  
14 underlying fathering behavior. It has been hypothesized that similar neural circuits are  
15 responsible for both maternal and paternal behaviors (Dulac et al., 2014). While  
16 alterations in neural activity appear to be hormonally regulated in females, hormonal  
17 manipulation in males does not have the same effect on paternal behavior (Saltzman and  
18 Ziegler, 2014). This has led some to suggest that maternal and paternal behavior depends  
19 upon non-homologous neuroendocrine circuits (Wynne-Edwards and Timonin, 2007),  
20 and has raised the question of what factors are involved in the generation of these  
21 behaviors.

22         Although the neuroendocrine contributions to parenting may vary by sex, it is  
23 believed that the neural circuit governing parental behavior is conserved across sex (Kohl

1 et al., 2018). The MPOA is a central node in the neural circuit that regulates both  
2 maternal and paternal care and has long been recognized as playing a critical role in the  
3 generation and regulation of parental behavior (see (Bales and Saltzman, 2016; Kohl and  
4 Dulac, 2018) for review). Paternal experience increases Fos immunoreactivity in the  
5 MPOA of California mice (de Jong et al., 2009). Virgin male prairie voles that were  
6 exposed to pups also showed an increase in Fos immunoreactivity within the MPOA  
7 (Kirkpatrick et al., 1994). Lesions of the MPOA disrupt both maternal and paternal  
8 behavior in biparental California mice (Lee and Brown, 2002), and maternal behavior in  
9 rats (Numan et al., 1988) and mice (Tsuneoka et al., 2013).

10 The relationship between maternal behavior and gene expression has been  
11 examined in a variety of species. The initiation of maternal behavior is reduced in  
12 oxytocin knock-out mice (Rich et al., 2014). In humans, differences in maternal  
13 responsiveness to babies and toddlers were associated with variants in serotonin  
14 transporter and oxytocin receptor genes (Bakermans-Kranenburg and van Ijzendoorn,  
15 2008; Feldman et al., 2012). Maternal experience in mice was linked to large scale  
16 changes in gene expression in the lateral septum (Eisinger et al., 2013). And mice that  
17 were bred for high or low levels of maternal aggression showed a wide range of  
18 differentially expressed genes within the hypothalamus (Gammie et al., 2007). It should  
19 be noted that these studies only examined mothers and the majority targeted a specific  
20 gene or genes that were already implicated in parental behavior or attachment. As such,  
21 they did not identify or examine novel gene targets that may also play a role in fathering  
22 behavior.

1           The goal of this study was to identify novel gene targets and potential  
2 mechanisms that may contribute to the production and regulation of paternal behavior.  
3 We analyzed gene expression in three groups of adult male prairie voles: virgin males,  
4 males who had formed a pair bond with a female, and males who had fathering  
5 experience. Samples were taken from the medial preoptic area (MPOA), a region that is  
6 central to the expression of both maternal and paternal behaviors (Dulac et al., 2014;  
7 Kuroda and Numan, 2014; Rilling and Young, 2014; Stolzenberg and Champagne, 2016),  
8 and RNA was extracted and sequenced.

9

## 10 **2. Materials and Methods:**

### 11 2.1 Subjects:

12 Subjects were 18 adult male prairie voles. Animals were born and housed in the  
13 Psychology Department Vivarium at the University of California, Davis. These animals  
14 were descendants of a wild stock originally caught near Champaign, Illinois. The animals  
15 were weaned at 20 days of age and pair housed with an animal of the same sex (sibling if  
16 available, similarly aged non-sibling if not) in small laboratory cages (27 x 16 x 13 cm)  
17 in which food and water were available *ad libitum*. All animals were maintained at  
18 approximately 70°F (21°C) on a 14:10 light/dark cycle with the lights on at 6 a.m. All  
19 experiments were performed under National Institutes of Health guidelines for the care of  
20 animals in research and were approved by the Institutional Animal Care and Use  
21 Committee of the University of California, Davis.

22           At postnatal day (P) 42-45 subjects were placed in one of three groups of age-  
23 matched males: 1) virgin males, 2) sexually experienced, “pair-bonded” males, or 3)

1 males with fathering experience (Figure 1). This was designed to dissociate alterations in  
2 gene expression that were related to pair bonding from alterations related to paternal  
3 behavior. Virgin males were housed with a male same-age conspecific, and they were  
4 euthanized without engaging in sexual contact with females. Pair-bonded males were  
5 housed with a same-age female conspecific for ~20 days, after which the males were  
6 euthanized. Because mating and pregnancy strengthens pair bonds in prairie voles (Insel  
7 et al., 1995; Williams et al., 1992; Winslow et al., 1993; Young and Wang, 2004), we  
8 confirmed that females were pregnant. Pair-bonded males were euthanized before  
9 females gave birth, ensuring they had no contact with pups. The third group consisted of  
10 males which had ~3 days of paternal experience. These males were also housed with  
11 female pair-mates with whom they presumably formed a pair-bond. The females gave  
12 birth, and the males were permitted three days of contact with pups before they were  
13 euthanized. Three days of parental experience was chosen to minimize age differences  
14 between subjects. Furthermore, prairie vole fathers already exhibit large amount of  
15 paternal care by postnatal day 3 (Oliveras and Novak, 1986; Perkeybile et al., 2013).

16 Subjects were anesthetized using isoflurane and euthanized via cervical  
17 dislocation. Upon euthanasia, brains were removed and flash frozen. The brains were  
18 sliced on a cryostat into 120  $\mu$ m sections and mounted on slides. Punches were taken  
19 from the MPOA using a 15.5-gauge blunt needle (Figure 2), and were stored in a -80  
20 freezer until RNA extraction. The sequence of analyses for this study is outlined in  
21 Figure 3.

22

23 2.2 RNA Extraction:

1 Total RNA was isolated with Qiazol reagent (Qiagen) and purified with an RNeasy®  
2 Plus Micro Kit (74004; Qiagen, Valencia, CA) as well as the optional DNase digestion  
3 (Qiagen 129046). A Nanodrop™ Spectrophotometer was used to determine the quality  
4 and quantity of the RNA. All samples had a 260/280 ratio > 1.8.

### 5 6 2.3 RNA Sequencing:

7 A total of 18 RNA-seq libraries were prepared from the RNA of the 18 male prairie voles  
8 (Table 1). RNA sequencing and library preparation was performed by the DNA  
9 Technologies and Expression Analysis Core in the Genome Center of the University of  
10 California, Davis. Barcoded RNA-seq libraries were generated from 1 ug total RNA each  
11 after poly-A enrichment using the Kapa Stranded RNA-seq kit (Kapa Biosystems, Cape  
12 Town, South Africa) following the instructions of the manufacturer. The libraries were  
13 generated on a Sciclone G3 liquid handler (Caliper Life Sciences, Alameda,  
14 CA). Quality was verified with the Bioanalyzer 2100 instrument (Agilent, Santa Clara,  
15 CA) and quantified by fluorometry on a Qubit instrument (LifeTechnologies, Carlsbad,  
16 CA) and pooled in equimolar ratios. The pooled library was then quantified by qPCR  
17 with a Kapa Library Quant kit (Kapa Biosystems) and sequenced on 1 lane of an Illumina  
18 HiSeq 4000 (Illumina, San Diego, CA) with paired-end 150bp reads.

19 Raw sequencing data have been deposited at NCBI's Sequence Read Archive  
20 (SRA) under study accession number SRP128134.

21

### 22 2.4 Bioinformatic analysis:



1           Bioinformatic analysis was performed by the UC Davis Bioinformatics Core  
2 Facility also in the Genome Center. Briefly, reads were trimmed for adapter  
3 contamination and quality using scythe (version c128b19) and sickle (version  
4 7667f147e6) respectively. The reads were then aligned to the prairie vole genome  
5 (MicOch1.0) using bwa mem (version 0.7.13), after which featureCounts (version 1.5.0-  
6 p1) was used to create the raw gene expressions counts. Finally, R (version 3.3.2) with  
7 the edgeR and limma/voom packages were used to filter and transform (voom  
8 transformation), and test for statistical significances between groups. Briefly, data were  
9 prepared by first choosing to keep genes that achieved at least 0.5 count per million  
10 (cpm) in at least five samples, normalization factors were calculated using trimmed mean  
11 of M-value (TMM), and the voom transformation was applied. A completely randomized  
12 design was implemented, comparisons of interest were extracted using contrasts, and  
13 moderated statistics were computed using the empirical bayes procedure eBayes. Finally,  
14 each gene was corrected for multiple testing using the Benjamini-Hochberg (BH) false  
15 discovery rate correction.

16

### 17 2.5 Gene Ontology Analysis

18           Differential gene expression was directly compared between each pair of groups,  
19 resulting in three comparisons: Virgin males vs Paired males (V vs P), Virgin males vs  
20 Fathers (V vs F), and Paired males vs Fathers (P vs F). None of the differentially  
21 expressed genes reached the level of statistical significance. In order to capture the genes  
22 that were most likely to show functional differentiation between comparison groups we  
23 performed gene ontology annotation enrichment analysis. The gene enrichment analysis

1 annotated the differentially expressed genes using one of three data sets: cellular  
2 component, molecular function, or biological process. Enrichment testing was conducted  
3 using Kolmogorov-Smirnov testing as implemented in the Bioconductor package topGO  
4 (Alexa and Rahnenfuhrer, 2016). We next examined the GO annotations that were  
5 significantly enriched (raw P value < 0.05) and selected the GO annotations in each  
6 comparison that were related to the brain or behavior, excluding unrelated annotations  
7 (i.e. GO:0003014, Renal system process or GO:0008354, Germ cell migration). We then  
8 categorized the remaining annotations based on gross function within each comparison  
9 group.

10

## 11 2.6 Kegg Pathways Analysis

12 We examined the functions with the highest fold enrichment ( $\frac{\# \text{ observed genes}}{\# \text{ expected genes}}$ , fold enrichment  $>|1|$ ,  $p < 0.05$ ), then identified individual genes  
13 associated with that function. We ran each individual gene through the Kegg Pathways  
14 database (Kyoto Encyclopedia of Genes and Genomes; <http://www.genome.jp/kegg/>) to  
15 identify molecular signaling pathways associated with that gene. A single gene may be  
16 involved in a number of different metabolic and biological pathways, so we then  
17 identified commonly recurring pathways associated with the individual differentially  
18 expressed genes. Pathways that were unrelated to brain function (for example, those that  
19 were involved in kidney, liver, or heart metabolism) were not included in the analysis.  
20 When a specific gene was associated with multiple pathways of interest it was identified  
21 as a candidate gene for further analysis. For example, *Grin2a* was associated with 6  
22 pathways that are involved in neural plasticity.  
23

1           Using the qualitative procedures described previously, we identified 49 candidate  
2 genes which display differential expression. We then averaged gene expression across  
3 animals within each condition and transformed the data into ratios; the values we used for  
4 all analyses were the ratios of gene expression in each condition relative to the virgin  
5 condition. The expression ratio of genes in virgin animals was set at 1, a value  $>1$   
6 indicated that genes were more expressed relative to virgins, and a value  $<1$  indicated that  
7 genes were less expressed relative to virgins. Thus, we analyzed whether gene expression  
8 for each gene varied between paired animals and fathers. Effect size was measured using  
9 Cohen's *d*.

10

#### 11 2.7 Assessment of gene interaction networks

12 After identifying each set of differentially expressed genes, we analyzed the connectivity  
13 of the gene network using the STRING Database ([string-db.org](http://string-db.org)) (Szklarczyk et al.,  
14 2017). The STRING database identifies protein-protein interactions between members of  
15 a gene set, which allows the user to build a network of functional gene interactions.  
16 STRING also measures the functional and interaction enrichments of the gene network,  
17 calling upon GO Annotations, Kegg pathways, and connections between nodes.

18

#### 19 2.8 NanoString Analysis

20 Following the identification of differentially expressed candidate genes, we performed a  
21 quantitative analysis of the expression of 33 genes (30 target genes and 3 housekeeping  
22 genes) using the nCounter SPRINT profiler (NanoString Technologies, Seattle, WA).  
23 Genes were chosen to be included in the NanoString analysis based on their differential

1 expression values as determined by the raw expression data, as well as their functional  
2 significance. One additional gene, *Bdnf*, was chosen due to previous studies indicating  
3 that it plays a significant role in plasticity and parenting (i.e., *Bdnf*) (Pereira, 2016;  
4 Tabbaa et al., 2017). The nCounter analysis assay was conducted using RNA that  
5 remained after the completion of the sequencing experiment.

6 Briefly, NanoString is a medium-throughput method that can analyze many genes  
7 within a single sample with comparable sensitivity and accuracy to quantitative real-time  
8 RT-PCR (Geiss et al., 2008). NanoString designed and manufactured custom probes  
9 corresponding to 33 genes we identified for quantitative analysis, consisting of 30 target  
10 genes and 3 housekeeping genes (*Gusb*, *Pgk1*, and *Eif4a2*). A codeset specific to a 100-  
11 base region of the target mRNA was designed using a 3' biotinylated capture probe and a  
12 5' reporter probe tagged with a specific fluorescent barcode. Data were collected using  
13 the nCounter Digital Analyzer by counting the number of individual barcodes.

14 Each transcript of interest was recognized by a capture probe and a reporter probe,  
15 each containing 30–50 bases complementary to the target mRNA. To minimize assay  
16 variability, the code sets also included negative and positive control reporter probes that  
17 were developed by the External RNA Control Consortium (ERCC). Six positive control  
18 reporter probes (ERCC-selected mRNA targets) were pre-mixed with (Spike-Ins) the  
19 code set at a concentration range (0.125–128 fM), a range corresponding to the  
20 expression levels of most mRNA of interest, to control for overall efficiency of probe  
21 hybridization and determine the detection range for transcripts of interest in each assay. A  
22 scaling factor was calculated for each sample, and a scaling factor outside the range of

1 0.3 to 3 indicated suboptimal hybridization. In our samples, the scaling factor always fell  
2 within the optimal range and was thus applied to all counts in the sample.

3 Quantitative expression data from the nCounter was downloaded and analyzed  
4 using the nSolver software package (NanoString Technologies, Seattle, WA). The raw  
5 counts for all transcripts were multiplied by the scaling factor to produce the adjusted  
6 counts. The relative expression was determined for each comparison group, and the effect  
7 size of the difference between expression values was determined using Cohen's *d*.  
8 Differential expression was also compared using t-tests, and p-values were adjusted for  
9 multiple comparisons in nSolver.

10

### 11 **3. Results**

#### 12 3.1 Gene Ontology Analysis

13 Individual genes are associated with gene ontology annotations in order to describe the  
14 various functions of a particular gene product. The cellular component analysis describes  
15 the locations of gene expression, at the levels of subcellular structures. The molecular  
16 function analysis describes the function that each gene product performs within the cell.  
17 The Biological Process Analysis describes a recognized series of events or collection of  
18 molecular functions associated with a gene or gene product. Each analysis was completed  
19 for all differentially expressed genes in each of the three comparison groups, Virgin vs  
20 Paired (*V vs P*), Virgin vs Father (*V vs F*), and Paired vs Father (*P vs F*). Because each  
21 GO Annotation references many genes, in some instances the same GO Annotation was  
22 present in multiple comparison groups.

1           The initial GO enrichment analysis returned 209 GO Annotations in the *V vs P*  
2 comparison, 222 annotations in the *V vs F* comparison, and 264 in the *P vs F* comparison  
3 that were significantly enriched. Upon selecting the GO annotations in each comparison  
4 that were related to the brain or behavior, we were left with 47 GO Annotations in the *V*  
5 *vs P* comparison, 47 annotations in the *V vs F* comparison, and 61 annotations in the *P vs*  
6 *F* comparison. (Tables 2-4). We then categorized these annotations based on gross  
7 function (Figure 4). The functional categories of GO annotations were differentially  
8 distributed across the three comparison groups. Annotations related to Neuropeptide  
9 activity were only found in the *V vs P* comparison, whereas Immune Function  
10 annotations were most predominant in the *V vs F* comparison. The *P vs F* comparison  
11 contained the greatest number of annotations related to Plasticity,  
12 DNA/RNA/Transcription, and Axon/Dendrite/Synapse.

13

### 14 3.2 Kegg Pathways Analysis:

15 In each comparison group we examined GO annotations with the highest fold enrichment  
16 (# observed genes/# expected genes) as well as functions related to neuronal activity,  
17 plasticity, or active biological processes, then identified individual genes associated with  
18 that function. We ran each individual gene through the Kegg Pathways database (Kyoto  
19 Encyclopedia of Genes and Genomes; <http://www.genome.jp/kegg/>) to identify molecular  
20 signaling pathways associated with that gene. Not every gene was associated with a  
21 molecular signaling pathway. We then identified commonly recurring pathways  
22 associated with the individual differentially expressed genes.

1           In the *V vs P* comparison group, the commonly recurring pathways included:  
2 Protein export, Protein processing in the endoplasmic reticulum, Thyroid hormone  
3 synthesis, Antigen processing and presentation, Ras signaling, Rap1 signaling,  
4 Neuroactive ligand-receptor pathway, Calcium signaling, and Regulation of the actin  
5 cytoskeleton. In the *V vs F* comparison group, the commonly recurring pathways  
6 included: Protein processing in the endoplasmic reticulum, Regulation of the actin  
7 cytoskeleton, Ras signaling, Metabolic pathways, Axon guidance, Protein processing in  
8 the endoplasmic reticulum, Thyroid hormone synthesis, and Antigen processing and  
9 presentation. In the *P vs F* comparison group, the commonly recurring pathways  
10 included: Ras signaling, Rap1 signaling, Neuroactive ligand-receptor pathway, Calcium  
11 signaling, MAPK signaling, LTP, Glutamatergic pathways, Dopaminergic pathways, and  
12 Regulation of the actin cytoskeleton.

13           We next identified genes that were associated with multiple Kegg pathways. By  
14 excluding genes that were not associated with any Kegg pathways, or were associated  
15 with pathways that were not related to brain function, we further narrowed the range of  
16 genes of interest to 49 genes. Ultimately, in each comparison group we identified genes  
17 with differential expression across social experience and that were linked to biological  
18 pathways within the brain (Table 5). We standardized the expression of each gene  
19 relative to its expression in virgin males then grouped genes that were associated with  
20 nine commonly recurring Kegg pathways and compared the expression of those genes  
21 across groups. Since this was an exploratory study, we did not perform statistical tests,  
22 and instead used Cohen's *d* as a measure of effect size (Figure 5; Table 6). We found  
23 large effects of differential expression in genes that were associated with long term

1    potentiation and long term depression (LTP and LTD) ( $d = 1.072$ ), Neurotransmitters ( $d$   
2     $= 0.911$ ), and  $\text{Ca}^{2+}$  Signaling ( $d = 0.877$ ). We found medium effects of differential  
3    expression in genes that were associated with Oxytocin Signaling ( $d = 0.787$ ), Protein  
4    Processing in the Endoplasmic Reticulum ( $d = 0.599$ ), and Ras/Rap1 Signaling ( $0.578$ ).

### 6    3.3 STRING Database Analysis:

7    We used the STRING database to assess the network connectivity between the genes in  
8    each comparison group that were identified as having a high degree of differential  
9    expression and functional significance. For each analysis, the STRING database  
10   constructed a network showing interactions between gene products, as well as the degree  
11   of enrichment. The STRING database also performed an enrichment analysis using both  
12   Gene Ontology Annotations and Kegg pathways, revealing statistically significant  
13   interactions between these gene products.

14        The 11 differentially expressed genes from the *V vs P* comparison group produced  
15   a network with 11 nodes and 11 edges, and a PPI enrichment p-value of  $5.86 \times 10^{-7}$   
16   (Figure 6A). Thus, the proteins expressed by these genes have significantly more  
17   interactions than would be expected by chance, as defined as a random set of similarly  
18   sized proteins selected from the genome. There was one cluster of 7 interacting proteins,  
19   and the functions of these gene products were primarily related to functions of the  
20   endoplasmic reticulum, as well as the cellular response to stimulation.

21        The 33 differentially expressed genes from the *V vs F* comparison group produced  
22   a network with 32 nodes and 29 edges, and a PPI enrichment p-value of  $6.99 \times 10^{-15}$   
23   (Figure 6B), indicating that the proteins expressed by these genes have significantly more



1 interactions than would be expected by chance. These gene products produced one large  
2 cluster of 9 interacting proteins, one medium cluster of 5 interacting proteins, and three  
3 separate small clusters of 2 interacting proteins. The large cluster was predominantly  
4 involved with the function of the endoplasmic reticulum. The medium cluster was  
5 involved with process of neural plasticity, including signaling pathways and modification  
6 of the actin cytoskeleton. The three small clusters were involved with the elongation of  
7 fatty acid chains, the formation of cholinergic receptors, and GPI-anchor synthesis.

8         The 31 differentially expressed genes from the *P vs F* comparison group produced  
9 a network with 31 nodes and 27 edges, and a PPI enrichment p-value of  $1.36 \times 10^{-12}$   
10 (Figure 6C), indicating that the proteins expressed by these genes have significantly more  
11 interactions than would be expected by chance. These gene products produced one large  
12 network consisting of 20 interacting proteins. The genes in this network were involved in  
13 a variety of functions, including synaptic plasticity and neural transmission, ion  
14 transmembrane transport, the cellular response to stimulus, and the structure of the  
15 synapse and dendrite.

16

### 17 3.4 NanoString Analysis

18 A total of 33 genes (30 target genes and 3 housekeeping genes) were selected for  
19 quantitative analysis using NanoString. The housekeeping genes (*Gusb*, *Pgk1*, and  
20 *Eif4a2*) did not show differential levels of expression across conditions, confirming that  
21 these genes can serve as a good baseline in prairie voles. A heat map analysis revealed  
22 that 23 of our 30 target genes had lower expression levels in fathers than in either virgins  
23 or paired males (Figure 7). Six genes had lower expression levels in virgins, and no gene

1 in any group appeared to show inordinately high levels of expression. A regression  
2 analysis revealed similar levels of gene expression across all experimental conditions  
3 (Figure 8A).

4 Expression data for each individual gene was compared across groups using t-  
5 tests, which were run and p-values were adjusted for multiple comparisons using nSolver  
6 software. Of the 30 target genes, 11 genes showed significant differential expression  
7 between comparison groups ( $p < 0.05$ ; *Cckbr*, *Rgs14*, *Itpr1*, *Ddn*, *Baiap*, *Gabrd*, *Chrm1*,  
8 *Kcnj4*, *Ngef*, *Prkcg*, and *Cacna2d3*; Figure 8B-O; Table 7). We also calculated the effect  
9 sizes using Cohen's d, examining differential expression of each gene across groups  
10 (Figure 8B-O; Table 8). In the V vs P group, we saw a large effect (defined as  $0.8 < d <$   
11  $1.2$ ) in *Tiam1*. In the P vs F group, we saw large effects ( $0.8 < d < 1.2$ ) in *Baiap2*,  
12 *Cacna2d3*, *Cckbr*, *Chrm1*, *Ddn*, *Dlg4*, *Gabrd*, *Itpr1*, *Kdr*, *P2rx3*, *Pde2a*, *Ptk2b*, and  
13 *Rasgrf2*. In the P vs F group we also saw very large effects (defined as  $d > 1.2$ ) in  
14 *Grin2b*, *Ngef*, *Prkcg*, *Rgs14*, and *Sipa111*. In the V vs F group we saw large effects ( $0.8 <$   
15  $d < 1.2$ ) in *Adora2a*, *Cacna2d3*, *Cckbr*, *Chrm1*, *Ddn*, *Gabrd*, *Grin2a*, *Grin2b*, *Itpr1*,  
16 *Kcnj4*, *Ngef*, *Prkcg*, *Ptk2b*, and *Sipa111*. In the V vs F group we also saw very large  
17 effects ( $d > 1.2$ ) in *Baiap2*, *Rgs14*, and *Rin1*.

18

#### 19 **4. Discussion:**

20 The transition to fatherhood is associated with a variety of environmental and  
21 behavioral changes. In this experiment we sought to identify alterations in central  
22 nervous system gene expression that are associated with fathering experience. To our  
23 knowledge, this is the first time that RNA sequencing has been performed on prairie vole

1 brain tissue. As such, we faced several technical challenges over the course of this study.  
2 For instance, while the prairie vole genome has been sequenced (McGraw et al., 2010;  
3 McGraw et al., 2011), its annotation is incomplete, leaving us to rely on the annotated  
4 mouse genome (*Mus musculus*) for many of our analyses. In addition, it is important to  
5 consider the consequences associated with working in an outbred rodent like prairie  
6 voles. The individual differences associated with an outbred population may have masked  
7 additional target genes associated with the onset of paternity. Regardless, we still  
8 observed significantly altered expression on both the individual gene and system level.  
9 These results suggest that paternity engages similar physiological mechanisms across  
10 males despite genetic diversity.

11 Biparental care is rare in mammals, but prairie voles are not the only rodents who  
12 exhibit this behavior. The males of several species of *Peromyscus*, including *Peromyscus*  
13 *californicus* and *Peromyscus polionotus*, exhibit paternal care, while other species,  
14 including *Peromyscus maniculatus*, do not. This behavioral distinction allowed Bendesky  
15 and colleagues to investigate genetic differences between *P. polionotus* and *P.*  
16 *maniculatus* that are linked to parenting behavior (Bendesky et al., 2017). In a series of  
17 experiments, they identified several quantitative trait loci that were linked to specific  
18 behaviors of interest, including nest building. Further analysis revealed that the gene for  
19 arginine vasopressin (AVP) was directly related to nest building, and when AVP was  
20 administered intracerebroventricularly there was a significant decrease in the quality of  
21 nest building (Bendesky et al., 2017). Unlike the study by Bendesky and colleagues, we  
22 did not find changes implicating AVP. However, there are several differences between  
23 the two experiments. In this study, we specifically examined gene expression within one

1 hypothalamic nucleus, the MPOA. Our study was in a different species and used males  
2 that had very specific social experiences: virgin males, pair bonded males, and males  
3 with fathering experience.

4 We targeted the MPOA specifically because it has long been understood to play a  
5 role in maternal behavior, and is also believed to be involved in paternal behavior.  
6 Lesions to the MPOA disrupt parental behavior in both male and female California mice  
7 (Lee and Brown, 2002). In California mouse males, testosterone levels within the MPOA  
8 vary in response to parental status (Trainor et al., 2003). Likewise, male California mice  
9 with fathering experience show increased Fos-like immunoreactivity in the MPOA  
10 following pup exposure (de Jong et al., 2009). To our knowledge, this is the first time that  
11 gene expression in the MPOA has been analyzed in the context of fathering behavior.

12 RNA sequencing is a powerful technique that allows us to identify alterations in  
13 gene expression that are associated with behavioral and other phenotypic changes (Wang  
14 et al., 2009). The greatest challenge with this technique, however, is the large amount of  
15 data it produces. There is no one agreed upon analysis that most effectively identifies  
16 specific genes of interest (Conesa et al., 2016; Zhang et al., 2014). Thus, in this study we  
17 used several techniques to reveal novel gene targets to further our understanding of  
18 paternal behavior. We believe that this is a strength rather than a weakness. All of the  
19 target genes identified in this experiment are associated with the experimental differences  
20 in social experience. The ultimate goal of this experiment was to increase our  
21 understanding of the alterations that occur within the MPOA following exposure to  
22 different social contexts in male prairie voles. As such, we have identified a set of genes  
23 and their associated pathways that we can use to further explore male parenting behavior.

1           Our quantitative assessment of gene expression revealed an overall decrease in  
2 the expression of many genes in fathers relative to both virgins and pair-bonded males.  
3 The specific genes of interest that we identified were involved in a range of physiological  
4 processes, including metabolism, stress responsiveness, and plasticity. However, most of  
5 the genes that showed significant differential expression, and specifically decreased  
6 expression, were associated with synaptic transmission and dendritic spine motility  
7 (Table 9). For example, several genes involved in the production and maintenance of  
8 receptors (including *Cckbr*, *Chrm1*, *Gabrd*, *Grin2b*, and *Itpr1*) and ion channels  
9 (including *Cacna2d3*, *Kcnj4*, and *P2rx3*) were significantly downregulated. These results  
10 suggest that GABA, glutamate, and cholinergic systems are all affected by fathering  
11 experience, as are calcium and potassium channels. Other genes that exhibited significant  
12 downregulation in fathers were involved with the actin cytoskeleton, dendritic spine  
13 motility, and other components of the physical plasticity of dendrites. We emphasize that  
14 this is not an exhaustive list of differentially expressed genes, however, these results  
15 suggest that synaptic plasticity may be diminished in the MPOA of male prairie voles  
16 with fathering experience.

17           We were surprised by the lack of differential expression of oxytocin and  
18 vasopressin related genes, however this finding is not unique within the literature. In a  
19 series of experiments, Kenkel and colleagues examined the neuroendocrine correlates of  
20 pup exposure in male prairie voles that were virgins or had fathering experience (Kenkel  
21 et al., 2012; Kenkel et al., 2014). They saw changes in OT immunoreactivity in  
22 PVN/BNST, but there were no changes to OT/AVP in the MPOA. Another study  
23 examined OT immunoreactive cells in male prairie voles that were virgins, had

1 established pair bonds, or had fathering experience (Wang et al., 2015). They saw an  
2 increase in the number of OT immunoreactive cells in the MPOA of paired males and  
3 fathers compared to virgin males, but there was a greater increase of OT-ir cells in the  
4 PVN of fathers compared to paired and virgin males. It is likely that examination of gene  
5 expression in the PVN would show alterations in OT gene expression. In future studies  
6 we hope to examine these and other brain regions.

7         Fatherhood also seems to be associated with structural alterations in neural  
8 plasticity, as measured by changes in the number and density of dendritic spines. Mice  
9 with fathering experience show increased survival of newborn neurons and increased  
10 dendritic spine density within the hippocampus (Glasper et al., 2016; Hyer et al., 2016).  
11 Male marmosets show an increase in dendritic spine density in the prefrontal cortex after  
12 fathering experience (Kozorovitskiy et al., 2006). However, other studies have shown  
13 reductions in the survival of adult-generated neurons in the amygdala and hippocampus  
14 (Glasper et al., 2011; Lieberwirth et al., 2013). It seems clear that the effects of  
15 fatherhood vary across brain regions, but we do not yet know what is causing these  
16 changes in neural plasticity.

17         The lower gene expression related to dendritic spines, shown to be associated  
18 with fatherhood in the present study, is evocative of similar changes seen in a recent  
19 study of the MPOA of mother rats (Parent et al., 2017). *Rem2*, a gene associated with  
20 reduction of dendritic branching but increases in spine density (Ghiretti et al., 2014;  
21 Ghiretti and Paradis, 2011) was increased in the MPOA of high licking/grooming rats,  
22 but only in lactating mothers (not in virgins). This increase was accompanied by  
23 decreased dendritic complexity. *Rem2* is involved with GTPase activity and GTP

1 binding. While we did not see alterations in *Rem2* expression in this study, we found  
2 differential expression of several genes that are involved in Ras and Rap1 signaling. Both  
3 Ras and Rap1 are GTPases that play an important role in the structural and functional  
4 plasticity of cells (Cahill et al., 2016; Zhu et al., 2002).

5         The down-regulation of genes associated with dendritic complexity in the present  
6 study, as well as the study by Parent and colleagues, is similar to what one would expect  
7 in an animal that had experienced high amounts of stress. It is well established that stress,  
8 mediated by corticotropin-releasing hormone, results in a loss of dendritic spines (Chen  
9 et al., 2008; Chen et al., 2013; Leuner and Shors, 2013; Liao et al., 2014; Radley et al.,  
10 2006). Interestingly, rat mothers show a decrease in the number and density of dendritic  
11 spines in the amygdala and stria terminalis four days after birth (Matsuo et al., 2017), and  
12 an increase in dendritic spine density in the hippocampus during the postpartum period  
13 (Kinsley et al., 2006). This suggests that alterations in dendritic spine density in mothers  
14 are both transient and region specific. More studies must be done to determine if the same  
15 holds true for vole fathers.

16         In many species, the transition to fatherhood is associated with a suite of behavioral  
17 and hormonal changes, including those indicative of stress. In California mice  
18 (*Peromyscus californicus*), fathers exhibit attenuated anxiety-like behavior approximately  
19 two weeks after pups are born (Glasper et al., 2016; Hyer et al., 2016). Human males  
20 show a peak in cortisol levels during the transition to fatherhood (Storey et al., 2000), but  
21 this is highly variable across studies (Gordon et al., 2010). Prairie vole fathers show  
22 increased anxiety-like behavior, and chronic pup exposure results in an increase in basal  
23 CORT levels (Lieberwirth et al., 2013). In an open field test, fathers spent more time in

1 corner squares, and in an elevated plus maze, fathers spent less time in open arms. In  
2 forced swim tests, fatherhood decreased the latency to immobility, and increased the  
3 number and duration of immobility bouts (Lieberwirth et al., 2013). Additionally, males  
4 with fathering experience showed fewer BrdU-labeled cells in the amygdala,  
5 hippocampus, and ventromedial hypothalamus than virgin males (Lieberwirth et al.,  
6 2013). In the long term, fatherhood may be beneficial for male health, but the transition  
7 to fatherhood is a tremendously stressful period (Bartlett, 2004).

8         In male voles with fathering experience we also see the upregulation of genes  
9 related to protein processing in the endoplasmic reticulum. The endoplasmic reticulum is  
10 instrumental in managing the protein folding process, including disposing of misfolded  
11 proteins (Zhang and Kaufman, 2008). Homeostatic imbalances, including stress, can alter  
12 the functioning of the endoplasmic reticulum, leading to the initiation of the unfolded-  
13 protein response, which can in turn lead to apoptosis (Banhegyi et al., 2007; Mandl et al.,  
14 2009). This may be one mechanism by which physiological stress can result in  
15 homeostatic perturbations (Walter and Ron, 2011; Zhang and Kaufman, 2006), including  
16 some of the changes that are evident in vole fathers, such as weight loss (Campbell et al.,  
17 2009; Kenkel et al., 2014).

18         While many of the changes we saw in gene expression may be partially  
19 attributable to stress, there are likely many other additional factors at play. Fathers in  
20 many species show systematic endocrine changes (Saltzman and Ziegler, 2014).  
21 Environmental factors, including changes in the types and amount of sensory stimulation,  
22 or the amount of parental care they received, may play a role as well (Braun and



1 Champagne, 2014; Champagne, 2016). Much more work must be done to tease apart  
2 these many factors.

3         In this study we saw the most varied and interesting differences between the  
4 paired males and males with fathering experience. This was surprising, as we expected  
5 that the greatest differences would be between the virgin males and fathers. However,  
6 examination of the quantitative results begins to clarify these findings (Figs 5 and 8). The  
7 expression of genes of interest is slightly elevated in paired animals relative to virgins,  
8 but the expression in fathers is decreased relative to virgins. Thus, while the expression  
9 levels of some genes do not significantly differ between virgins and paired males, and  
10 virgins and fathers, we found significant differences between paired males and fathers.  
11 This may suggest that the experience of fathering is functionally distinct from any other  
12 type of social interactions that these animals have encountered.

13

#### 14 *4.1 Conclusions*

15         The purpose of this study was to explore how gene expression changed across the  
16 transition to fatherhood, and to identify novel targets to allow for deeper investigation of  
17 male parenting behavior. The use of RNA sequencing confirmed that there are  
18 differences in gene expression between voles that had different social experiences,  
19 including virgin males, males that had formed a pair bond with a female, and males with  
20 parenting experience. The genes identified in this study suggest novel processes that are  
21 related to paternal behavior and offer new targets for the further exploration of fathering  
22 behavior.

23



1 Acknowledgments:

2 The sequencing was carried out at the DNA Technologies and Expression Analysis Cores  
3 at the UC Davis Genome Center, supported by NIH Shared Instrumentation Grant  
4 1S10OD010786-01, and was made possible by a pilot grant from the UC Davis Genome  
5 Center. Thanks to Chris Harshaw for helpful analytical suggestions. Thanks to Cindy  
6 Clayton and Rhonda Oates-O'Brien for husbandry and veterinary care of the prairie vole  
7 colony. And special thanks to the anonymous reviewers for their helpful and constructive  
8 comments on this manuscript.

9

10

1 Table 1: RNA data

2

| <b>ID</b> | <b>Raw Reads</b> | <b>Trimmed Reads</b> | <b>% Reads Kept</b> | <b>% Aligned</b> | <b>% Aligned to rRNA</b> |
|-----------|------------------|----------------------|---------------------|------------------|--------------------------|
| V1        | 25764898         | 25657648             | 99.58373598         | 95.1             | 5.67                     |
| V2        | 20747099         | 20665472             | 99.60656186         | 95.99            | 2.63                     |
| V3        | 23633483         | 23500072             | 99.43550005         | 96.13            | 2.07                     |
| V4        | 17827384         | 17709907             | 99.34103063         | 96.06            | 2.38                     |
| V5        | 22459377         | 22360940             | 99.56171091         | 95.59            | 4.09                     |
| V6        | 22690769         | 22591612             | 99.56300732         | 96.09            | 2.78                     |
| P1        | 22451193         | 22317681             | 99.40532336         | 92.7             | 8.72                     |
| P2        | 23931482         | 23837973             | 99.60926365         | 95.84            | 2.26                     |
| P3        | 21258757         | 21155922             | 99.51626993         | 94.97            | 5.00                     |
| P4        | 20114070         | 20011415             | 99.48963586         | 95.86            | 3.16                     |
| P5        | 21770575         | 21677246             | 99.57130668         | 96.11            | 2.06                     |
| P6        | 19282593         | 19185302             | 99.49544649         | 95.73            | 3.28                     |
| F1        | 20833672         | 20702987             | 99.3727222          | 95.14            | 4.82                     |
| F2        | 21680207         | 21568888             | 99.48654088         | 95.99            | 2.53                     |
| F3        | 20565896         | 20479195             | 99.57842342         | 96.06            | 1.65                     |
| F4        | 19759347         | 19680046             | 99.59866589         | 96.17            | 2.27                     |
| F5        | 21472445         | 21367346             | 99.51054014         | 95.95            | 3.06                     |
| F6        | 22055401         | 21961628             | 99.57482977         | 96.31            | 2.32                     |

3

4

1 Table 2: Virgin vs Paired Gene Ontology Annotations

2

| GO ID      | GO Annotation                                                      | # genes | Raw P Value |
|------------|--------------------------------------------------------------------|---------|-------------|
| GO:0032286 | central nervous system myelin maintenance                          | 4       | 0.003       |
| GO:0044224 | juxtaparanode region of axon                                       | 6       | 0.0034      |
| GO:0019933 | cAMP-mediated signaling                                            | 61      | 0.0056      |
| GO:0045597 | positive regulation of cell differentiation                        | 475     | 0.006       |
| GO:0050790 | regulation of catalytic activity                                   | 800     | 0.0063      |
| GO:0048406 | nerve growth factor binding                                        | 4       | 0.0076      |
| GO:0035749 | myelin sheath adaxonal region                                      | 4       | 0.0078      |
| GO:0042043 | neurexin family protein binding                                    | 5       | 0.008       |
| GO:0008277 | regulation of G-protein coupled receptor protein signaling pathway | 53      | 0.0081      |
| GO:0061002 | negative regulation of dendritic spine morphogenesis               | 4       | 0.0083      |
| GO:0007218 | neuropeptide signaling pathway                                     | 16      | 0.0092      |
| GO:0071277 | cellular response to calcium ion                                   | 28      | 0.0106      |
| GO:0042102 | positive regulation of T cell proliferation                        | 38      | 0.0117      |
| GO:0098656 | anion transmembrane transport                                      | 58      | 0.012       |
| GO:0042048 | olfactory behavior                                                 | 6       | 0.0129      |
| GO:0044548 | S100 protein binding                                               | 9       | 0.0132      |
| GO:0043679 | axon terminus                                                      | 29      | 0.0138      |
| GO:0048485 | sympathetic nervous system development                             | 13      | 0.014       |
| GO:0061014 | positive regulation of mRNA catabolic process                      | 24      | 0.0145      |
| GO:0006401 | RNA catabolic process                                              | 107     | 0.0147      |
| GO:0005184 | neuropeptide hormone activity                                      | 5       | 0.0152      |
| GO:0043220 | Schmidt-Lanterman incisure                                         | 8       | 0.0158      |
| GO:0002052 | positive regulation of neuroblast proliferation                    | 12      | 0.0158      |
| GO:1902711 | GABA-A receptor complex                                            | 4       | 0.016       |
| GO:1900271 | regulation of long-term synaptic potentiation                      | 11      | 0.0168      |
| GO:0051965 | positive regulation of synapse assembly                            | 49      | 0.0176      |
| GO:2000144 | positive regulation of DNA-templated transcription, initiation     | 10      | 0.018       |
| GO:0022851 | GABA-gated chloride ion channel activity                           | 3       | 0.018       |
| GO:0000123 | histone acetyltransferase complex                                  | 56      | 0.0186      |
| GO:0035976 | transcription factor AP-1 complex                                  | 5       | 0.019       |
| GO:0008626 | granzyme-mediated apoptotic signaling pathway                      | 3       | 0.0194      |
| GO:0021879 | forebrain neuron differentiation                                   | 38      | 0.0198      |
| GO:0048011 | neurotrophin TRK receptor signaling pathway                        | 15      | 0.0202      |
| GO:2000147 | positive regulation of cell motility                               | 235     | 0.0212      |
| GO:0071933 | Arp2/3 complex binding                                             | 4       | 0.0216      |
| GO:0005125 | cytokine activity                                                  | 15      | 0.0217      |

|            |                                               |     |        |
|------------|-----------------------------------------------|-----|--------|
| GO:0007271 | synaptic transmission, cholinergic            | 7   | 0.0228 |
| GO:0035176 | social behavior                               | 31  | 0.0249 |
| GO:0035198 | miRNA binding                                 | 11  | 0.0255 |
| GO:0070723 | response to cholesterol                       | 10  | 0.0256 |
| GO:0005856 | cytoskeleton                                  | 919 | 0.0257 |
| GO:0005272 | sodium channel activity                       | 23  | 0.0263 |
| GO:0042391 | regulation of membrane potential              | 194 | 0.0276 |
| GO:0050775 | positive regulation of dendrite morphogenesis | 13  | 0.0283 |
| GO:0008188 | neuropeptide receptor activity                | 15  | 0.0299 |
| GO:0006814 | sodium ion transport                          | 69  | 0.0316 |
| GO:0008021 | synaptic vesicle                              | 52  | 0.0355 |

1

1 Table 3: Virgin vs Father Gene Ontology Annotations

2

| GO ID      | GO Annotation                                                          | # genes | Raw P Value |
|------------|------------------------------------------------------------------------|---------|-------------|
| GO:0001975 | response to amphetamine                                                | 11      | 0.00033     |
| GO:0016310 | phosphorylation                                                        | 981     | 0.00097     |
| GO:0007191 | adenylate cyclase-activating dopamine receptor signaling pathway       | 6       | 0.00172     |
| GO:1903861 | positive regulation of dendrite extension                              | 16      | 0.00206     |
| GO:0043278 | response to morphine                                                   | 7       | 0.00239     |
| GO:0060391 | positive regulation of SMAD protein signal transduction                | 8       | 0.00258     |
| GO:0005254 | chloride channel activity                                              | 29      | 0.0027      |
| GO:0000082 | G1/S transition of mitotic cell cycle                                  | 95      | 0.00378     |
| GO:0005516 | calmodulin binding                                                     | 36      | 0.0038      |
| GO:0042110 | T cell activation                                                      | 210     | 0.00406     |
| GO:0008091 | spectrin                                                               | 3       | 0.006       |
| GO:0043406 | positive regulation of MAP kinase activity                             | 98      | 0.00781     |
| GO:0071277 | cellular response to calcium ion                                       | 28      | 0.0082      |
| GO:0019228 | neuronal action potential                                              | 12      | 0.0093      |
| GO:0097440 | apical dendrite                                                        | 4       | 0.0098      |
| GO:0030857 | negative regulation of epithelial cell differentiation                 | 23      | 0.01001     |
| GO:0051098 | regulation of binding                                                  | 214     | 0.01046     |
| GO:0007626 | locomotory behavior                                                    | 143     | 0.01116     |
| GO:0014002 | astrocyte development                                                  | 18      | 0.01447     |
| GO:0010862 | positive regulation of pathway-restricted SMAD protein phosphorylation | 20      | 0.0151      |
| GO:0007249 | I-kappaB kinase/NF-kappaB signaling                                    | 104     | 0.01513     |
| GO:0048681 | negative regulation of axon regeneration                               | 9       | 0.01835     |
| GO:0005815 | microtubule organizing center                                          | 413     | 0.0185      |
| GO:0048715 | negative regulation of oligodendrocyte differentiation                 | 10      | 0.0188      |
| GO:0001963 | synaptic transmission, dopaminergic                                    | 19      | 0.01883     |
| GO:0001726 | ruffle                                                                 | 80      | 0.0191      |
| GO:0008023 | transcription elongation factor complex                                | 29      | 0.0194      |
| GO:0019233 | sensory perception of pain                                             | 38      | 0.0198      |
| GO:0060158 | phospholipase C-activating dopamine receptor signaling pathway         | 4       | 0.02016     |
| GO:0043235 | receptor complex                                                       | 178     | 0.0212      |
| GO:0002407 | dendritic cell chemotaxis                                              | 6       | 0.02176     |
| GO:0005912 | adherens junction                                                      | 151     | 0.0224      |
| GO:0019538 | protein metabolic process                                              | 2271    | 0.02608     |
| GO:0017146 | NMDA selective glutamate receptor complex                              | 8       | 0.0274      |

|            |                                                                   |     |         |
|------------|-------------------------------------------------------------------|-----|---------|
| GO:0042098 | T cell proliferation                                              | 88  | 0.03093 |
| GO:0031340 | positive regulation of vesicle fusion                             | 4   | 0.03095 |
| GO:0003909 | DNA ligase activity                                               | 3   | 0.0332  |
| GO:0002682 | regulation of immune system process                               | 531 | 0.03451 |
| GO:0005921 | gap junction                                                      | 9   | 0.0375  |
| GO:0000778 | condensed nuclear chromosome kinetochore                          | 4   | 0.0399  |
| GO:0071144 | heteromeric SMAD protein complex                                  | 2   | 0.0451  |
| GO:0035240 | dopamine binding                                                  | 4   | 0.0455  |
| GO:0099604 | ligand-gated calcium channel activity                             | 19  | 0.0469  |
| GO:0032444 | activin responsive factor complex                                 | 2   | 0.0471  |
| GO:0005247 | voltage-gated chloride channel activity                           | 2   | 0.0475  |
| GO:0001591 | dopamine neurotransmitter receptor activity,<br>coupled via Gi/Go | 2   | 0.0479  |
| GO:0001042 | RNA polymerase I core binding                                     | 2   | 0.0493  |

1



1 Table 4: Paired vs Father Gene Ontology Annotations

2

| GO ID      | GO Annotation                                                          | # genes | Raw P Value |
|------------|------------------------------------------------------------------------|---------|-------------|
| GO:0005955 | calcineurin complex                                                    | 4       | 0.00104     |
| GO:0050840 | extracellular matrix binding                                           | 33      | 0.00172     |
| GO:0046959 | habituation                                                            | 4       | 0.0031      |
| GO:0007626 | locomotory behavior                                                    | 144     | 0.0032      |
| GO:2001223 | negative regulation of neuron migration                                | 7       | 0.004       |
| GO:0046330 | positive regulation of JNK cascade                                     | 64      | 0.0043      |
| GO:0060079 | excitatory postsynaptic potential                                      | 36      | 0.0043      |
| GO:0060391 | positive regulation of SMAD protein signal transduction                | 8       | 0.0047      |
| GO:0015116 | sulfate transmembrane transporter activity                             | 3       | 0.00473     |
| GO:0070723 | response to cholesterol                                                | 10      | 0.0048      |
| GO:0001696 | gastric acid secretion                                                 | 6       | 0.005       |
| GO:0051281 | positive regulation of release of sequestered calcium ion into cytosol | 20      | 0.005       |
| GO:0060395 | SMAD protein signal transduction                                       | 38      | 0.0051      |
| GO:0042755 | eating behavior                                                        | 10      | 0.0057      |
| GO:0033192 | calmodulin-dependent protein phosphatase activity                      | 4       | 0.00583     |
| GO:0000403 | Y-form DNA binding                                                     | 4       | 0.00644     |
| GO:0010001 | glial cell differentiation                                             | 118     | 0.0065      |
| GO:0048407 | platelet-derived growth factor binding                                 | 11      | 0.0071      |
| GO:0017134 | fibroblast growth factor binding                                       | 11      | 0.00772     |
| GO:0016575 | histone deacetylation                                                  | 32      | 0.008       |
| GO:0045893 | positive regulation of transcription, DNA-templated                    | 783     | 0.009       |
| GO:0005516 | calmodulin binding                                                     | 36      | 0.01032     |
| GO:0007616 | long-term memory                                                       | 18      | 0.0104      |
| GO:0005882 | intermediate filament                                                  | 30      | 0.01192     |
| GO:0061014 | positive regulation of mRNA catabolic process                          | 24      | 0.0122      |
| GO:0060080 | inhibitory postsynaptic potential                                      | 9       | 0.0124      |
| GO:0035418 | protein localization to synapse                                        | 22      | 0.0141      |
| GO:0008009 | chemokine activity                                                     | 4       | 0.01592     |
| GO:0007015 | actin filament organization                                            | 169     | 0.0166      |
| GO:0070410 | co-SMAD binding                                                        | 8       | 0.01861     |
| GO:0007212 | dopamine receptor signaling pathway                                    | 20      | 0.0198      |
| GO:0001973 | adenosine receptor signaling pathway                                   | 5       | 0.0199      |
| GO:0005102 | signaling receptor binding                                             | 554     | 0.02035     |
| GO:0000978 | RNA polymerase II proximal promoter sequence-specific DNA binding      | 232     | 0.02098     |

|            |                                                                      |     |         |
|------------|----------------------------------------------------------------------|-----|---------|
| GO:0005736 | DNA-directed RNA polymerase I complex                                | 7   | 0.02166 |
| GO:0004930 | G-protein coupled receptor activity                                  | 110 | 0.02186 |
| GO:0050882 | voluntary musculoskeletal movement                                   | 6   | 0.0224  |
| GO:0000307 | cyclin-dependent protein kinase holoenzyme complex                   | 27  | 0.02343 |
| GO:0030374 | ligand-dependent nuclear receptor transcription coactivator activity | 24  | 0.02383 |
| GO:0097110 | scaffold protein binding                                             | 35  | 0.02393 |
| GO:0008622 | epsilon DNA polymerase complex                                       | 3   | 0.02522 |
| GO:0005881 | cytoplasmic microtubule                                              | 29  | 0.02579 |
| GO:0000118 | histone deacetylase complex                                          | 28  | 0.02583 |
| GO:0099061 | integral component of postsynaptic density membrane                  | 2   | 0.02667 |
| GO:0044309 | neuron spine                                                         | 40  | 0.02738 |
| GO:0044295 | axonal growth cone                                                   | 7   | 0.02809 |
| GO:0071144 | heteromeric SMAD protein complex                                     | 2   | 0.02824 |
| GO:0043197 | dendritic spine                                                      | 37  | 0.02853 |
| GO:0043235 | receptor complex                                                     | 179 | 0.0291  |
| GO:0015271 | outward rectifier potassium channel activity                         | 5   | 0.0317  |
| GO:0042805 | actinin binding                                                      | 16  | 0.03185 |
| GO:0003700 | DNA binding transcription factor activity                            | 385 | 0.03189 |
| GO:0019905 | syntaxin binding                                                     | 25  | 0.03526 |
| GO:0098831 | presynaptic active zone cytoplasmic component                        | 2   | 0.03658 |
| GO:0005794 | Golgi apparatus                                                      | 562 | 0.04007 |
| GO:0000976 | transcription regulatory region sequence-specific DNA binding        | 368 | 0.04263 |
| GO:0017016 | Ras GTPase binding                                                   | 161 | 0.04338 |
| GO:0030864 | cortical actin cytoskeleton                                          | 34  | 0.04449 |
| GO:0014069 | postsynaptic density                                                 | 77  | 0.04529 |
| GO:0060053 | neurofilament cytoskeleton                                           | 2   | 0.04637 |
| GO:0008076 | voltage-gated potassium channel complex                              | 41  | 0.04825 |

1

1 Table 5: Differentially expressed genes

2

| <b>Comparison</b> | <b>Genes</b>                                                                                                                                                                                                                            |
|-------------------|-----------------------------------------------------------------------------------------------------------------------------------------------------------------------------------------------------------------------------------------|
| V vs P            | Cckar, Dnajc3, Enah, Hspa5, Hyou1, Pak3, Pdia3, Pdia4, Rala, Sorbs1, Th                                                                                                                                                                 |
| V vs F            | Arpc5, Baiap2, Cbl, Chrm1, Chrna1, Cyp2s1, Derl1, Dnajc3, Elovl1, Elovl6, Enah, Epha2, Erp29, Faah, Glra3, Hspa5, Itgb4, Kcnj4, Ksr1, Lamtor3, Nf2, Pdia3, Pdia4, Pdia6, Pigh, Pigo, Pla2g16, Pomgnt2, Prkgc, Pvrl3, Rdx, Tram1, Txndc5 |
| P vs F            | Adcy4, Adora2a, Atp2b1, Baiap2, Cacna2d3, Cacnb3, Cckbr, Chrm1, Ddn, Dlg4, Gabrd, Gpr156, Grin2a, Grin2b, Ifngr1, Itpr1, Kcnj2, Kcnj4, Kcnn3, Kdr, Lama2, Ngef, P2rx3, Park2, Prkcg, Ptk2b, Rasgrf2, Rgs14, Rin1, Sipa111, Tiam1        |

3

4

1 Table 6: Pathways associated with differentially expressed genes

2

|                                  |                                                                                                                                     |
|----------------------------------|-------------------------------------------------------------------------------------------------------------------------------------|
| Neurotransmitters                | Adcy4, Adora2a, Cacna2d3, Cacnb3, Cckar, Cckbr, Chrm1, Dlg4, Gabrd, Gpr156, Grin2a, Grin2b, Itpr1, Kcnj2, Kcnj4, P2rx3, Prkcg, Rin1 |
| Ca signaling                     | Adcy4, Adora2a, Cckar, Cckbr, Chrm1, Grin2a, Grin2b, Itpr1, P2rx3, Ptk2b, Rin1                                                      |
| OT signaling                     | Adcy4, Cacna2d3, Cacnb3, Kcnj2, Kcnj4, Itpr1, Prkcg                                                                                 |
| Regulation of actin cytoskeleton | Arpc5, Baiap2, Chrm1, Enah, Itgb4, Rdx, Tiam1, Enah, Pak3                                                                           |
| Ras/Rap1 signaling               | Adcy4, Adora2a, Epha2, Grin2a, Grin2b, Kdr, Ksr1, Pak3, Pla2g16, Prkcg, Rala, Rasgrf2, Rgs14, Rin1, Sipa1l1, Tiam1                  |
| Protein processing in ER         | Derl1, Dnajc3, Erp29, Hspa5, Hyou1, Pdia3, Pdia4, Pdia6, Tram1, Txndc5                                                              |
| Thyroid hormone synthesis        | Adcy4, Itpr1, Prkcg, Pdia4, Hspa5                                                                                                   |
| LTP/LTD                          | Grin2a, Grin2b, Itpr1, Rin1                                                                                                         |

3

4

1 Table 7: P-values

2

| Gene Name       | F vs P        | F vs V        | P vs V |
|-----------------|---------------|---------------|--------|
| <i>Adora2a</i>  | 0.1014        | 0.2444        | 0.9891 |
| <i>Baiap2</i>   | <b>0.0014</b> | 0.0776        | 0.7946 |
| <i>Bdnf</i>     | 0.6273        | 0.2702        | 0.4012 |
| <i>Cacna2d3</i> | <b>0.0460</b> | <b>0.0326</b> | 0.9266 |
| <i>Cacnb3</i>   | 0.4862        | 0.5735        | 0.2516 |
| <i>Cckbr</i>    | <b>0.0120</b> | 0.0767        | 0.7745 |
| <i>Chrm1</i>    | <b>0.0050</b> | 0.0876        | 0.7353 |
| <i>Ddn</i>      | <b>0.0021</b> | 0.0829        | 0.6383 |
| <i>Dlg4</i>     | 0.2146        | 0.6877        | 0.2711 |
| <i>Gabrd</i>    | <b>0.0018</b> | 0.0803        | 0.5384 |
| <i>Gal</i>      | 0.6783        | 0.2519        | 0.1944 |
| <i>Gpr156</i>   | 0.8590        | 0.7849        | 0.8507 |
| <i>Grin2a</i>   | 0.2294        | 0.1292        | 0.7381 |
| <i>Grin2b</i>   | 0.0778        | 0.0877        | 0.7291 |
| <i>Itpr1</i>    | <b>0.0500</b> | 0.0906        | 0.8406 |
| <i>Kcnj2</i>    | 0.3466        | 0.1956        | 0.7144 |
| <i>Kcnj4</i>    | <b>0.0474</b> | 0.2362        | 0.8533 |
| <i>Kdr</i>      | 0.2402        | 0.3649        | 0.8613 |
| <i>Negr1</i>    | 0.5673        | 0.8722        | 0.4501 |
| <i>Ngef</i>     | <b>0.0061</b> | 0.1282        | 0.5444 |
| <i>P2rx3</i>    | 0.0605        | 0.3671        | 0.2208 |
| <i>Pde2a</i>    | 0.0677        | 0.2581        | 0.6827 |
| <i>Prkcg</i>    | <b>0.0427</b> | <b>0.0390</b> | 0.8554 |
| <i>Ptk2b</i>    | 0.0729        | 0.0996        | 0.9024 |
| <i>Rasgrf2</i>  | 0.1027        | 0.1289        | 0.8217 |
| <i>Rgs14</i>    | <b>0.0002</b> | <b>0.0237</b> | 0.4867 |
| <i>Rin1</i>     | 0.1646        | 0.0696        | 0.2535 |
| <i>Sipa1l1</i>  | 0.0612        | 0.1155        | 0.5573 |
| <i>Th</i>       | 0.4437        | 0.4343        | 0.1845 |
| <i>Tiam1</i>    | 0.7299        | 0.2976        | 0.2510 |

3

4 **Bold** indicates significant values

5

1 Table 8: Cohen's d values

2

| Gene Name       | F vs P        | F vs V        | P vs V        |
|-----------------|---------------|---------------|---------------|
| <i>Adora2a</i>  | 0.5380        | <b>0.9243</b> | 0.3863        |
| <i>Baiap2</i>   | <b>0.9039</b> | <b>1.2258</b> | 0.3220        |
| <i>Bdnf</i>     | 0.2066        | 0.6260        | 0.4194        |
| <i>Cacna2d3</i> | <b>1.0766</b> | <b>1.1004</b> | 0.0239        |
| <i>Cacnb3</i>   | 0.4467        | 0.3052        | 0.7520        |
| <i>Cckbr</i>    | <b>0.9881</b> | <b>0.9884</b> | 0.0003        |
| <i>Chrm1</i>    | <b>0.9371</b> | <b>1.0050</b> | 0.0679        |
| <i>Ddn</i>      | <b>1.0688</b> | <b>1.0685</b> | 0.0003        |
| <i>Dlg4</i>     | <b>0.8759</b> | 0.1721        | 0.7037        |
| <i>Gabrd</i>    | <b>0.9480</b> | <b>0.9667</b> | 0.0187        |
| <i>Gal</i>      | 0.2902        | 0.4687        | 0.7589        |
| <i>Gpr156</i>   | 0.0103        | 0.2844        | 0.2947        |
| <i>Grin2a</i>   | 0.6531        | <b>0.8749</b> | 0.2218        |
| <i>Grin2b</i>   | <b>1.2351</b> | <b>1.0075</b> | 0.2276        |
| <i>Itpr1</i>    | <b>0.8004</b> | <b>1.0156</b> | 0.2152        |
| <i>Kcnj2</i>    | 0.5576        | 0.7754        | 0.2178        |
| <i>Kcnj4</i>    | 0.6183        | <b>0.8591</b> | 0.2407        |
| <i>Kdr</i>      | <b>0.8634</b> | 0.6950        | 0.1683        |
| <i>Negr1</i>    | 0.3141        | <b>0.1085</b> | 0.4227        |
| <i>Ngef</i>     | <b>1.1987</b> | <b>0.9933</b> | 0.2054        |
| <i>P2rx3</i>    | <b>1.1447</b> | 0.4699        | 0.6748        |
| <i>Pde2a</i>    | <b>0.9381</b> | 0.7403        | 0.1978        |
| <i>Prkcg</i>    | <b>1.2933</b> | <b>1.1543</b> | 0.1389        |
| <i>Ptk2b</i>    | <b>0.8524</b> | <b>0.9836</b> | 0.1313        |
| <i>Rasgrf2</i>  | <b>0.9509</b> | 0.7855        | 0.1654        |
| <i>Rgs14</i>    | <b>1.5018</b> | <b>1.2370</b> | 0.2648        |
| <i>Rin1</i>     | 0.7439        | <b>1.4011</b> | 0.6572        |
| <i>Sipa1l1</i>  | <b>1.2207</b> | <b>0.9080</b> | 0.3127        |
| <i>Th</i>       | 0.3234        | 0.4063        | 0.7297        |
| <i>Tiam1</i>    | 0.3216        | 0.5269        | <b>0.8484</b> |

3 **Bold** indicates large effect ( $0.8 < d < 1.2$ )

4 **Bold italics** indicates very large effect ( $d > 1.2$ )

5

1 **Table 9: Genes of interest**

| Gene ID  | Gene Name                                                        | Function                                    | GO Annotations                                                                                                       |
|----------|------------------------------------------------------------------|---------------------------------------------|----------------------------------------------------------------------------------------------------------------------|
| Baiap2   | Brain-specific angiogenesis inhibitor 1-Associated protein 2     | Insulin receptor tyrosine kinase substrate  | Signaling, Regulation of Biological Quality, Membrane Part, Dendrite, Dendritic Spine, Synapse                       |
| Cacna2d3 | Calcium voltage gated channel, auxiliary subunit alpha 2 delta 3 | Voltage gated calcium channel               | Ion Channel Activity                                                                                                 |
| Cckbr    | Cholecystokinin B receptor                                       | Multipass transmembrane receptor protein    | Signaling, Regulation of Biological Quality                                                                          |
| Chrm1    | Cholinergic receptor, muscarinic 1                               | Muscarinic receptor                         | Signaling, Regulation of Biological Quality, Membrane Part, Dendrite, Synapse                                        |
| Ddn      | Dendrin                                                          | plasma membrane surrounding dendritic spine | Membrane Part                                                                                                        |
| Gabrd    | GABA A receptor, subunit delta                                   | GABA receptor                               | Signaling, Dendrite, Synapse, Ion Channel Activity                                                                   |
| Grin2b   | Glutamate receptor, ionotropic, NMDA 2b                          | NMDA receptor                               | Signaling, Regulation of Biological Quality, Membrane Part, Dendrite, Dendritic Spine, Synapse, Ion Channel Activity |
| Itpr1    | inositol 1,4,5-triphosphate receptor 1                           | Calcium channel                             | Signaling, Regulation of Biological Quality, Membrane Part, Dendrite, Synapse, Ion Channel Activity                  |
| Kcnj4    | potassium voltage gated channel subfamily J member 4             | potassium channels - ion homeostasis        | Membrane Part, Dendrite, Synapse, Ion Channel Activity                                                               |
| Ngef     | Neuronal guanine nucleotide exchange factor                      | dendritic spine morphogenesis               | Signaling, Membrane Part                                                                                             |
| P2rx3    | purinergic receptor p2x, ligand gated ion channel                | ATP receptor                                | Signaling, Regulation of Biological Quality, Membrane Part, Dendrite, Dendritic Spine, Synapse, Ion Channel Activity |
| Pde2a    | Phosphodiesterase 2a                                             | 2nd messenger signaling/dendritic spines    | Signaling, Regulation of Biological Quality, Membrane Part, Dendrite                                                 |
| Prkcg    | protein kinase c gamma                                           | signaling protein                           | Signaling, Membrane Part, Dendrite, Synapse                                                                          |
| Ptk2b    | protein tyrosine kinase 2 beta                                   | ion channel regulation; MapK signaling      | Signaling, Regulation of Biological Quality, Membrane Part, Dendrite, Dendritic Spine, Synapse, Ion Channel Activity |
| Rgs14    | regulator of g-protein signaling 14                              | scaffold protein                            | Signaling, Regulation of Biological Quality, Membrane Part, Dendrite, Dendritic Spine, Synapse                       |
| Rin1     | Ras and Rab interactor 1                                         | Ras effector                                | Signaling, Regulation of Biological Quality, Membrane Part, Dendrite                                                 |

|         |                                                    |              |                                                                                                      |
|---------|----------------------------------------------------|--------------|------------------------------------------------------------------------------------------------------|
| Sipa111 | signal induced proliferation<br>associate 1 like 1 | Ras effector | Signaling, Regulation of Biological Quality,<br>Membrane Part, Dendrite, Dendritic Spine,<br>Synapse |
|---------|----------------------------------------------------|--------------|------------------------------------------------------------------------------------------------------|

1

2



1 **Figure Legends:**

2 **Figure 1:** Timeline of social interactions across the lifespan. All subjects were separated  
3 from their parents and removed from their home cage at postnatal day (P) 20 and housed  
4 with a same-sex conspecific. Around P42, males assigned to the “paired” and “father”  
5 groups were rehoused with an opposite-sex conspecific, while males in the “virgin”  
6 group remained with their same-sex conspecific. 20 days later (~P62), the subjects in the  
7 “virgin” and “paired” groups were euthanized and their brains were removed. One day  
8 later (~P63), pups were born to the males in the “father” group, and these males were  
9 euthanized 2-3 days later (~P65).

10

11 **Figure 2:** A schematic representing the area from which tissue samples were taken. The  
12 circumference of the tissue punch is delineated by a circle, and the MPOA is outlined in  
13 black. The tissue punches removed the entirety of the MPOA, as well as small portions of  
14 adjacent hypothalamic tissue.

15

16 **Figure 3:** Analysis plan for RNA sequencing experiment. Following the collection of  
17 brain tissue, RNA was extracted from the MPOA and sequenced at the UC Davis  
18 Expression Analysis Core facility. The resulting sequences were linked to specific genes  
19 and analyzed for relative frequency at the UC Davis Bioinformatics Core facility. The top  
20 500 differentially expressed genes in each comparison group were analyzed using the  
21 Gene Ontology database ([geneontology.org](http://geneontology.org)) and Kegg Pathways analysis ([www.kegg.jp](http://www.kegg.jp)).  
22 These analyses allowed us to identify a subset of genes of interest and their associated  
23 biological processes that were differentially expressed in each comparison group. We

1 then analyzed the interrelatedness of these groups of genes using STRING Database  
2 analysis (string-db.org). Finally, the expression of 30 genes of interest was quantitatively  
3 expressed using the NanoString Analysis.

4

5 **Figure 4:** Enrichment of Gene Ontology Annotations across comparison groups. The  
6 gene enrichment analysis grouped the differentially expressed genes using gene ontology  
7 annotations data. We selected significantly enriched GO annotations and identified the  
8 annotations that were involved in brain or behavioral processes. Those annotations were  
9 then categorized by function within each comparison group. We identified 9 functional  
10 groups: plasticity (red), DNA/RNA/Transcription (blue), Axon/Dendrite/Synapse  
11 (yellow), Ion channel/Receptor (purple), Neuropeptides (green), Immune function  
12 (orange), Metabolism (brown), Glia (white), and Other (gray). We saw differences in the  
13 relative distribution of GO annotation functional groups across the comparison groups.  
14 Neuropeptides were only seen in the *V vs P* group, whereas the *V vs F* group showed a  
15 high number of annotations related to Immune Function. The *P vs F* group contained the  
16 largest number of annotations related to Plasticity, DNA/RNA/Transcription, and  
17 Axon/Dendrite/Synapse.

18

19 **Figure 5:** Gene expression in paired males and fathers relative to virgin males. Using the  
20 Kegg Pathways analysis, we identified nine pathways of biological or behavioral  
21 significance and their associated differentially expressed genes. The mean expression of  
22 genes associated with each pathway in fathers was averaged and compared against  
23 expression in virgin males. On the whole, gene expression was decreased in fathers

1 relative to both virgins and paired males. Of the nine pathways, only one showed an  
2 increase in gene expression in fathers (protein processing in the endoplasmic reticulum),  
3 while five showed decreases in gene expression in fathers (Ras/Rap1 signaling, Oxytocin  
4 signaling, Neurotransmitters, Calcium signaling, and LTP/LTD). The overall average  
5 gene expression is indicated by black stars. Values that exhibited medium effect sizes  
6 ( $0.5 < \text{Cohen's } d < 0.8$ ) are indicated by blue squares and values that exhibited large  
7 effect sizes ( $\text{Cohen's } d > 0.8$ ) are indicated by red triangles).

8

9 **Figure 6:** STRING Database analysis of gene product interaction networks. Selected  
10 differentially expressed genes were run through the STRING database of gene product  
11 interactions, and networks were generated for each comparison. A) Paired vs Virgin  
12 network. B) Virgin vs Father. C) Paired vs Father.

13

14 **Figure 7:** Heat map representing the relative expression of individual genes in virgin  
15 males, paired males, and males with fathering experience. Gene enrichment is encoded in  
16 the heat map ranging from low (green) to high (red). Genes that show similar expression  
17 patterns are clustered together, as indicated by the dendrogram to the left of the heat map.

18

19 **Figure 8:** Quantitative analysis of differential gene expression. A) A scatterplot showing  
20 B-O) Box and whisker plots showing the expression of genes in virgins, paired males,  
21 and fathers. The whiskers represent 1.5x the interquartile range. While we quantified 30  
22 genes, here we show the 14 genes that exhibited significantly different levels of  
23 expression across groups or exhibited large effect size. In each gene of these genes,

1 expression in fathers was lower than expression in paired males, and in three cases  
2 (Rgs14, Prkcg, and Cacna2d3) expression in fathers was also significantly lower than in  
3 virgin males. \* - Significantly differs from fathers ( $p < 0.05$ ). † - Large effect size  
4 compared to fathers (Cohen's  $d > 0.8$ ).

5

6

1 **References:**

- 2
- 3 Alexa A, Rahnenfuhrer J. 2016. topGo: Enrichment analysis for gene ontology. Version  
4 R package version 2.32.0.
- 5 Arias Del Razo R, Bales KL. 2016. Exploration in a dispersal task: Effects of early  
6 experience and correlation with other behaviors in prairie voles (*Microtus*  
7 *ochrogaster*). *Behavioural processes* 132:66-75.
- 8 Bakermans-Kranenburg MJ, van Ijzendoorn MH. 2008. Oxytocin receptor (OXTR) and  
9 serotonin transporter (5-HTT) genes associated with observed parenting. *Soc*  
10 *Cogn Affect Neurosci* 3(2):128-134.
- 11 Bales K, French JA, Dietz JM. 2002. Explaining variation in maternal care in a  
12 cooperatively breeding mammal. *Animal Behaviour* 63:453-461.
- 13 Bales KL, Saltzman W. 2016. Fathering in rodents: Neurobiological substrates and  
14 consequences for offspring. *Horm Behav* 77:249-259.
- 15 Banhegyi G, Baumeister P, Benedetti A, Dong D, Fu Y, Lee AS, Li J, Mao C, Margittai  
16 E, Ni M, Paschen W, Piccirella S, Senesi S, Sitia R, Wang M, Yang W. 2007.  
17 Endoplasmic reticulum stress. *Annals of the New York Academy of Sciences*  
18 1113:58-71.
- 19 Bartlett E. 2004. The effects of fatherhood on the health of men: A review of the  
20 literature. *The Journal of Men's Health and Gender* 1(2-3):159-169.
- 21 Bendesky A, Kwon YM, Lassance JM, Lewarch CL, Yao S, Peterson BK, He MX, Dulac  
22 C, Hoekstra HE. 2017. The genetic basis of parental care evolution in  
23 monogamous mice. *Nature*.
- 24 Bester-Meredith JK, Marler CA. 2003. Vasopressin and the transmission of paternal  
25 behavior across generations in mated, cross-fostered *Peromyscus* mice.  
26 *Behavioral Neuroscience* 117(3):455-463.
- 27 Braun K, Champagne FA. 2014. Paternal influences on offspring development:  
28 behavioural and epigenetic pathways. *Journal of neuroendocrinology* 26(10):697-  
29 706.
- 30 Cahill ME, Bagot RC, Gancarz AM, Walker DM, Sun H, Wang ZJ, Heller EA, Feng J,  
31 Kennedy PJ, Koo JW, Cates HM, Neve RL, Shen L, Dietz DM, Nestler EJ. 2016.  
32 Bidirectional Synaptic Structural Plasticity after Chronic Cocaine Administration  
33 Occurs through Rap1 Small GTPase Signaling. *Neuron* 89(3):566-582.
- 34 Campbell JC, Laugero KD, Van Westerhuyzen JA, Hostetler CM, Cohen JD, Bales KL.  
35 2009. Costs of pair-bonding and paternal care in male prairie voles (*Microtus*  
36 *ochrogaster*). *Physiology & behavior* 98(3):367-373.
- 37 Cantoni D, Brown RE. 1997. Paternal investment and reproductive success in the  
38 California mouse, *Peromyscus californicus*. *Animal behaviour* 54(2):377-386.
- 39 Champagne FA. 2016. Epigenetic legacy of parental experiences: Dynamic and  
40 interactive pathways to inheritance. *Dev Psychopathol* 28(4pt2):1219-1228.
- 41 Chen Y, Dube CM, Rice CJ, Baram TZ. 2008. Rapid loss of dendritic spines after stress  
42 involves derangement of spine dynamics by corticotropin-releasing hormone. *J*  
43 *Neurosci* 28(11):2903-2911.
- 44 Chen Y, Kramar EA, Chen LY, Babayan AH, Andres AL, Gall CM, Lynch G, Baram  
45 TZ. 2013. Impairment of synaptic plasticity by the stress mediator CRH involves

- 1 selective destruction of thin dendritic spines via RhoA signaling. *Mol Psychiatry*  
2 18(4):485-496.
- 3 Conesa A, Madrigal P, Tarazona S, Gomez-Cabrero D, Cervera A, McPherson A,  
4 Szczesniak MW, Gaffney DJ, Elo LL, Zhang X, Mortazavi A. 2016. A survey of  
5 best practices for RNA-seq data analysis. *Genome Biol* 17:13.
- 6 de Jong TR, Chauke M, Harris BN, Saltzman W. 2009. From here to paternity: neural  
7 correlates of the onset of paternal behavior in California mice (*Peromyscus*  
8 *californicus*). *Horm Behav* 56(2):220-231.
- 9 Dulac C, O'Connell LA, Wu Z. 2014. Neural control of maternal and paternal behaviors.  
10 *Science* 345(6198):765-770.
- 11 Eisinger BE, Zhao C, Driessen TM, Saul MC, Gammie SC. 2013. Large scale expression  
12 changes of genes related to neuronal signaling and developmental processes found  
13 in lateral septum of postpartum outbred mice. *PloS one* 8(5):e63824.
- 14 Feldman R, Zagoory-Sharon O, Weisman O, Schneiderman I, Gordon I, Maoz R, Shalev  
15 I, Ebstein RP. 2012. Sensitive parenting is associated with plasma oxytocin and  
16 polymorphisms in the OXTR and CD38 genes. *Biological psychiatry* 72(3):175-  
17 181.
- 18 Frazier CR, Trainor BC, Cravens CJ, Whitney TK, Marler CA. 2007. Paternal behavior  
19 influences development of aggression and vasopressin expression in male  
20 California mouse offspring. *Hormones and Behavior* 50:699-707.
- 21 Gammie SC, Auger AP, Jessen HM, Vanzo RJ, Awad TA, Stevenson SA. 2007. Altered  
22 gene expression in mice selected for high maternal aggression. *Genes Brain*  
23 *Behav* 6(5):432-443.
- 24 Geiss GK, Bumgarner RE, Birditt B, Dahl T, Dowidar N, Dunaway DL, Fell HP, Ferree  
25 S, George RD, Grogan T, James JJ, Maysuria M, Mitton JD, Oliveri P, Osborn  
26 JL, Peng T, Ratcliffe AL, Webster PJ, Davidson EH, Hood L, Dimitrov K. 2008.  
27 Direct multiplexed measurement of gene expression with color-coded probe pairs.  
28 *Nat Biotechnol* 26(3):317-325.
- 29 Ghiretti AE, Moore AR, Brenner RG, Chen LF, West AE, Lau NC, Van Hooser SD,  
30 Paradis S. 2014. Rem2 is an activity-dependent negative regulator of dendritic  
31 complexity in vivo. *J Neurosci* 34(2):392-407.
- 32 Ghiretti AE, Paradis S. 2011. The GTPase Rem2 regulates synapse development and  
33 dendritic morphology. *Developmental neurobiology* 71(5):374-389.
- 34 Glasper ER, Hyer MM, Katakam J, Harper R, Ameri C, Wolz T. 2016. Fatherhood  
35 contributes to increased hippocampal spine density and anxiety regulation in  
36 California mice. *Brain Behav* 6(1):e00416.
- 37 Glasper ER, Kozorovitskiy Y, Pavlic A, Gould E. 2011. Paternal experience suppresses  
38 adult neurogenesis without altering hippocampal function in *Peromyscus*  
39 *californicus*. *J Comp Neurol* 519(11):2271-2281.
- 40 Gordon I, Zagoory-Sharon O, Leckman JF, Feldman R. 2010. Oxytocin, cortisol, and  
41 triadic family interactions. *Physiology & behavior* 101(5):679-684.
- 42 Gubernick DJ, Alberts JR. 1987. The biparental care system of the California mouse,  
43 *Peromyscus californicus*. *J Comp Psychol* 101(2):169-177.
- 44 Hyer MM, Hunter TJ, Katakam J, Wolz T, Glasper ER. 2016. Neurogenesis and anxiety-  
45 like behavior in male California mice during the mate's postpartum period. *The*  
46 *European journal of neuroscience* 43(5):703-709.

- 1 Insel TR, Preston S, Winslow JT. 1995. Mating in the monogamous male: behavioral  
2 consequences. *Physiology & behavior* 57(4):615-627.
- 3 Kenkel WM, Paredes J, Yee JR, Pournajafi-Nazarloo H, Bales KL, Carter CS. 2012.  
4 Neuroendocrine and behavioural responses to exposure to an infant in male  
5 prairie voles. *Journal of neuroendocrinology* 24(6):874-886.
- 6 Kenkel WM, Suboc G, Carter CS. 2014. Autonomic, behavioral and neuroendocrine  
7 correlates of paternal behavior in male prairie voles. *Physiology & behavior*  
8 128:252-259.
- 9 Kinsley CH, Trainer R, Stafisso-Sandoz G, Quadros P, Marcus LK, Hearon C, Meyer  
10 EA, Hester N, Morgan M, Kozub FJ, Lambert KG. 2006. Motherhood and the  
11 hormones of pregnancy modify concentrations of hippocampal neuronal dendritic  
12 spines. *Horm Behav* 49(2):131-142.
- 13 Kirkpatrick B, Kim JW, Insel TR. 1994. Limbic system fos expression associated with  
14 paternal behavior. *Brain Res* 658(1-2):112-118.
- 15 Kleiman DG. 1977. Monogamy in mammals. *Quarterly Review of Biology* 52:39-69.
- 16 Kohl J, Babayan BM, Rubinstein ND, Autry AE, Marin-Rodriguez B, Kapoor V,  
17 Miyamishi K, Zweifel LS, Luo L, Uchida N, Dulac C. 2018. Functional circuit  
18 architecture underlying parental behaviour. *Nature* 556(7701):326-331.
- 19 Kohl J, Dulac C. 2018. Neural control of parental behaviors. *Curr Opin Neurobiol*  
20 49:116-122.
- 21 Kozorovitskiy Y, Hughes M, Lee K, Gould E. 2006. Fatherhood affects dendritic spines  
22 and vasopressin V1a receptors in the primate prefrontal cortex. *Nat Neurosci*  
23 9(9):1094-1095.
- 24 Kuroda KO, Numan M. 2014. The medial preoptic area and the regulation of parental  
25 behavior. *Neurosci Bull* 30(5):863-865.
- 26 Lee AW, Brown RE. 2002. Medial preoptic lesions disrupt parental behavior in both  
27 male and female California mice (*Peromyscus californicus*). *Behavioral*  
28 *neuroscience* 116(6):968-975.
- 29 Leuner B, Shors TJ. 2013. Stress, anxiety, and dendritic spines: what are the connections?  
30 *Neuroscience* 251:108-119.
- 31 Liao XM, Yang XD, Jia J, Li JT, Xie XM, Su YA, Schmidt MV, Si TM, Wang XD.  
32 2014. Blockade of corticotropin-releasing hormone receptor 1 attenuates early-life  
33 stress-induced synaptic abnormalities in the neonatal hippocampus. *Hippocampus*  
34 24(5):528-540.
- 35 Lieberwirth C, Wang Y, Jia X, Liu Y, Wang Z. 2013. Fatherhood reduces the survival of  
36 adult-generated cells and affects various types of behavior in the prairie vole  
37 (*Microtus ochrogaster*). *The European journal of neuroscience* 38(9):3345-3355.
- 38 Lukas D, Clutton-Brock TH. 2013. The evolution of social monogamy in mammals.  
39 *Science* 341(6145):526-530.
- 40 Mandl J, Meszaros T, Banhegyi G, Hunyady L, Csala M. 2009. Endoplasmic reticulum:  
41 nutrient sensor in physiology and pathology. *Trends Endocrinol Metab* 20(4):194-  
42 201.
- 43 Matsuo S, Matsuda KI, Takanami K, Mori T, Tanaka M, Kawata M, Kitawaki J. 2017.  
44 Decrease in neuronal spine density in the postpartum period in the amygdala and  
45 bed nucleus of the stria terminalis in rat. *Neurosci Lett* 641:21-25.

- 1 McGraw LA, Davis JK, Lowman JJ, ten Hallers BF, Koriabine M, Young LJ, de Jong PJ,  
2 Rudd MK, Thomas JW. 2010. Development of genomic resources for the prairie  
3 vole (*Microtus ochrogaster*): construction of a BAC library and vole-mouse  
4 comparative cytogenetic map. *BMC genomics* 11:70.
- 5 McGraw LA, Davis JK, Young LJ, Thomas JW. 2011. A genetic linkage map and  
6 comparative mapping of the prairie vole (*Microtus ochrogaster*) genome. *BMC*  
7 *Genet* 12:60.
- 8 Mendoza SP, Mason WA. 1997. Attachment relationships in New World primates.  
9 *Annals of the New York Academy of Sciences* 807:203-209.
- 10 Numan M, Corodimas KP, Numan MJ, Factor EM, Piers WD. 1988. Axon-sparing  
11 lesions of the preoptic region and substantia innominata disrupt maternal behavior  
12 in rats. *Behavioral neuroscience* 102(3):381-396.
- 13 Oliveras D, Novak M. 1986. A comparison of paternal behaviour in the meadow vole  
14 *Microtus pennsylvanicus*, the pine voles, *M. pinetorum* and the prairie vole *M.*  
15 *ochrogaster*. *Animal behaviour*(34):519-526.
- 16 Opie C, Atkinson QD, Dunbar RI, Shultz S. 2013. Male infanticide leads to social  
17 monogamy in primates. *Proc Natl Acad Sci U S A* 110(33):13328-13332.
- 18 Parent C, Wen X, Dhir SK, Ryan R, Diorio J, Zhang TY. 2017. Maternal care associates  
19 with differences in morphological complexity in the medial preoptic area.  
20 *Behavioural brain research* 326:22-32.
- 21 Pereira M. 2016. Structural and functional plasticity in the maternal brain circuitry. In:  
22 Rutherford HJV, Mayes LC, editors. *Maternal brain plasticity: Preclinical and*  
23 *human research and implications for intervention New Directions for child and*  
24 *adolescent development.* p 23-46.
- 25 Perkeybile AM, Bales KL. 2015a. Early rearing experience is associated with vasopressin  
26 immunoreactivity but not reactivity to an acute non-social stressor in the prairie  
27 vole. *Physiology & Behavior* 147:149-156.
- 28 Perkeybile AM, Bales KL. 2015b. Early rearing experience is related to altered  
29 aggression and vasopressin production following chronic social isolation in the  
30 prairie vole. *Behavioural Brain Research* 283:37-46.
- 31 Perkeybile AM, Griffin LL, Bales KL. 2013. Natural variation in early parental care  
32 correlates with social behaviors in adolescent prairie voles (*Microtus*  
33 *ochrogaster*). *Frontiers in Behavioral Neuroscience* 7:21.
- 34 Radley JJ, Rocher AB, Miller M, Janssen WG, Liston C, Hof PR, McEwen BS, Morrison  
35 JH. 2006. Repeated stress induces dendritic spine loss in the rat medial prefrontal  
36 cortex. *Cereb Cortex* 16(3):313-320.
- 37 Rich ME, deCardenas EJ, Lee HJ, Caldwell HK. 2014. Impairments in the initiation of  
38 maternal behavior in oxytocin receptor knockout mice. *PloS one* 9(6):e98839.
- 39 Rilling JK, Young LJ. 2014. The biology of mammalian parenting and its effect on  
40 offspring social development. *Science* 345(6198):771-776.
- 41 Runcie MJ. 2000. Biparental care and obligate monogamy in the rock-haunting possum,  
42 *Petropseudes dahli*, from tropical Australia. *Animal behaviour* 59(5):1001-1008.
- 43 Saltzman W, Ziegler TE. 2014. Functional significance of hormonal changes in  
44 mammalian fathers. *Journal of neuroendocrinology* 26(10):685-696.



- 1 Stolzenberg DS, Champagne FA. 2016. Hormonal and non-hormonal bases of maternal  
2 behavior: The role of experience and epigenetic mechanisms. *Horm Behav*  
3 77:204-210.
- 4 Storey AE, Walsh CJ, Quinton RL, Wynne-Edwards KE. 2000. Hormonal correlates of  
5 paternal responsiveness in new and expectant fathers. *Evol Hum Behav* 21(2):79-  
6 95.
- 7 Szklarczyk D, Morris JH, Cook H, Kuhn M, Wyder S, Simonovic M, Santos A,  
8 Doncheva NT, Roth A, Bork P, Jensen LJ, von Mering C. 2017. The STRING  
9 database in 2017: quality-controlled protein-protein association networks, made  
10 broadly accessible. *Nucleic acids research* 45(D1):D362-D368.
- 11 Tabbaa M, Lei K, Liu Y, Wang Z. 2017. Paternal deprivation affects social behaviors and  
12 neurochemical systems in the offspring of socially monogamous prairie voles.  
13 *Neuroscience* 343:284-297.
- 14 Thomas JA, Birney EC. 1979. Parental Care and Mating System of the Prairie Vole,  
15 *Microtus-Ochrogaster*. *Behav Ecol Sociobiol* 5(2):171-186.
- 16 Trainor BC, Bird IM, Alday NA, Schlinger BA, Marler CA. 2003. Variation in aromatase  
17 activity in the medial preoptic area and plasma progesterone is associated with the  
18 onset of paternal behavior. *Neuroendocrinology* 78(1):36-44.
- 19 Tsuneoka Y, Maruyama T, Yoshida S, Nishimori K, Kato T, Numan M, Kuroda KO.  
20 2013. Functional, anatomical, and neurochemical differentiation of medial  
21 preoptic area subregions in relation to maternal behavior in the mouse. *J Comp*  
22 *Neurol* 521(7):1633-1663.
- 23 Walter P, Ron D. 2011. The unfolded protein response: from stress pathway to  
24 homeostatic regulation. *Science* 334(6059):1081-1086.
- 25 Wang B, Li Y, Wu R, Zhang S, Tai F. 2015. Behavioral responses to pups in males with  
26 different reproductive experiences are associated with changes in central OT, TH  
27 and OTR, D1R, D2R mRNA expression in mandarin voles. *Horm Behav* 67:73-  
28 82.
- 29 Wang Z, Gerstein M, Snyder M. 2009. RNA-Seq: a revolutionary tool for  
30 transcriptomics. *Nat Rev Genet* 10(1):57-63.
- 31 Williams JR, Catania KC, Carter CS. 1992. Development of Partner Preferences in  
32 Female Prairie Voles (*Microtus-Ochrogaster*) - the Role of Social and Sexual  
33 Experience. *Horm Behav* 26(3):339-349.
- 34 Winslow JT, Hastings N, Carter CS, Harbaugh CR, Insel TR. 1993. A role for central  
35 vasopressin in pair bonding in monogamous prairie voles. *Nature* 365(6446):545-  
36 548.
- 37 Wynne-Edwards KE, Timonin ME. 2007. Paternal care in rodents: weakening support for  
38 hormonal regulation of the transition to behavioral fatherhood in rodent animal  
39 models of biparental care. *Horm Behav* 52(1):114-121.
- 40 Young LJ, Wang Z. 2004. The neurobiology of pair bonding. *Nat Neurosci* 7(10):1048-  
41 1054.
- 42 Zhang K, Kaufman RJ. 2006. The unfolded protein response: a stress signaling pathway  
43 critical for health and disease. *Neurology* 66(2 Suppl 1):S102-109.
- 44 Zhang K, Kaufman RJ. 2008. From endoplasmic-reticulum stress to the inflammatory  
45 response. *Nature* 454(7203):455-462.

- 1 Zhang ZH, Jhaveri DJ, Marshall VM, Bauer DC, Edson J, Narayanan RK, Robinson GJ,  
2 Lundberg AE, Bartlett PF, Wray NR, Zhao QY. 2014. A comparative study of  
3 techniques for differential expression analysis on RNA-Seq data. PloS one  
4 9(8):e103207.
- 5 Zhu JJ, Qin Y, Zhao M, Van Aelst L, Malinow R. 2002. Ras and Rap control AMPA  
6 receptor trafficking during synaptic plasticity. Cell 110(4):443-455.  
7

# Experiment Timeline

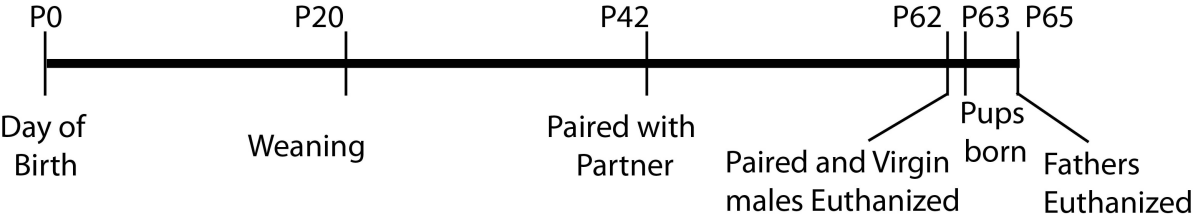

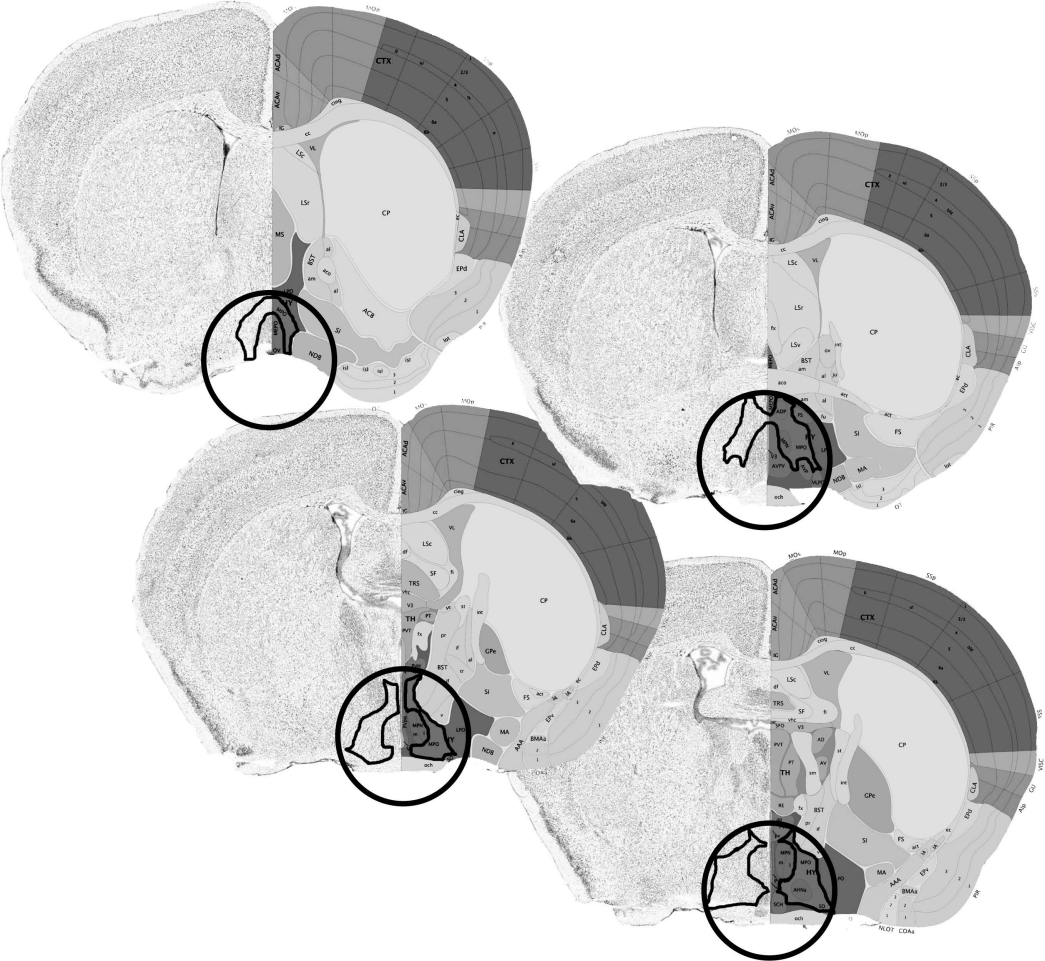

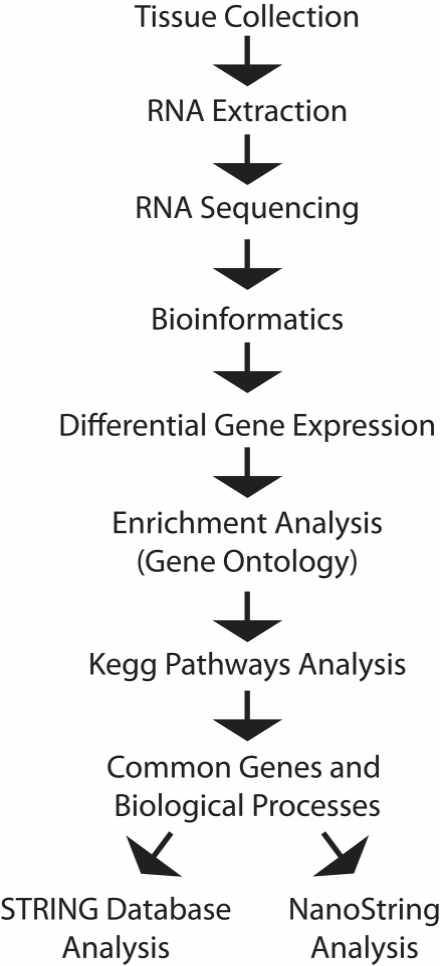

# Gene Ontology Annotations

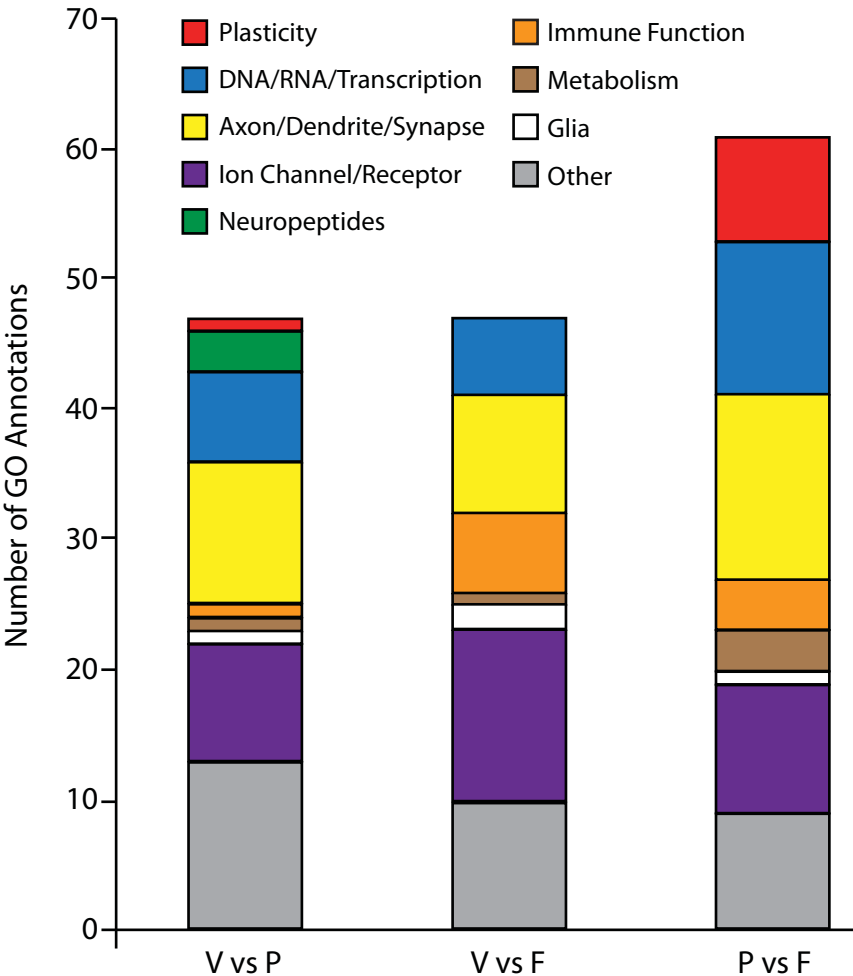

# Expression Relative to Virgin Males

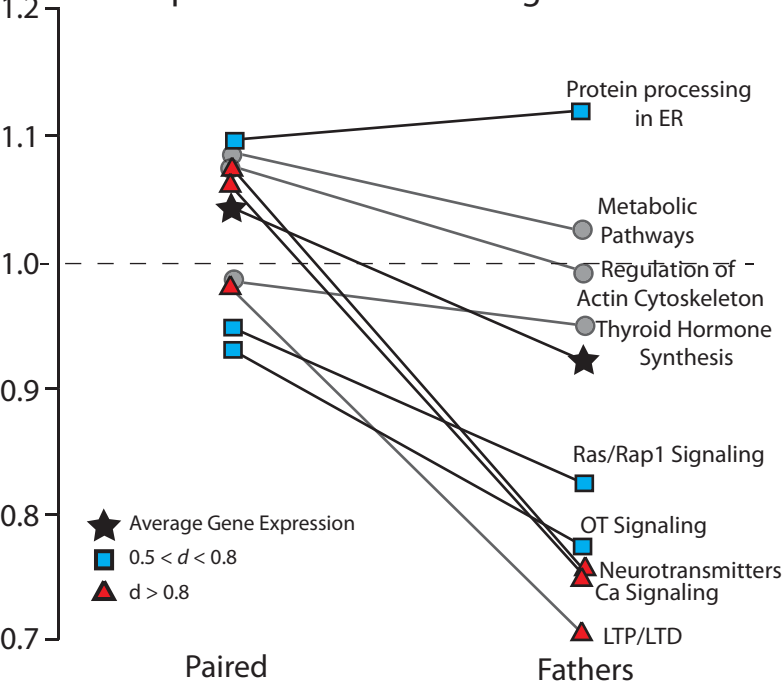

### A. Paired vs Virgin

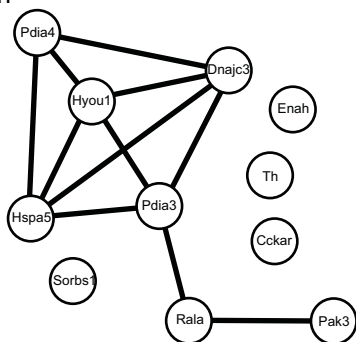

### B. Virgin vs Father

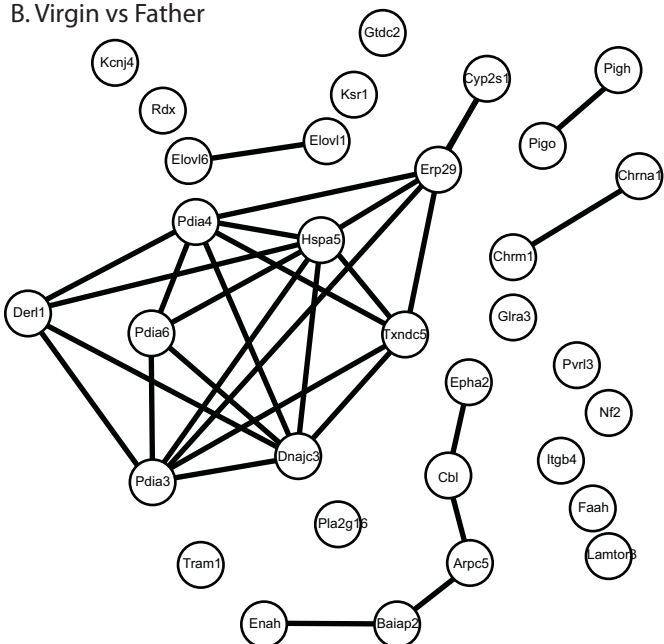

### C. Paired vs Father

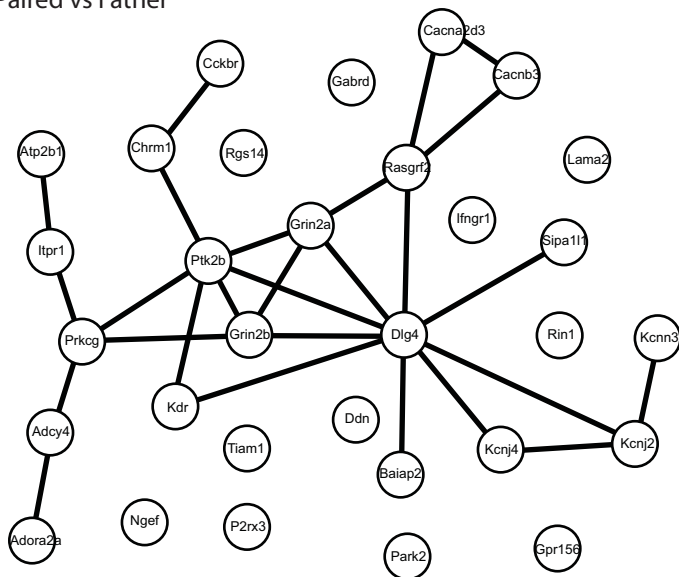



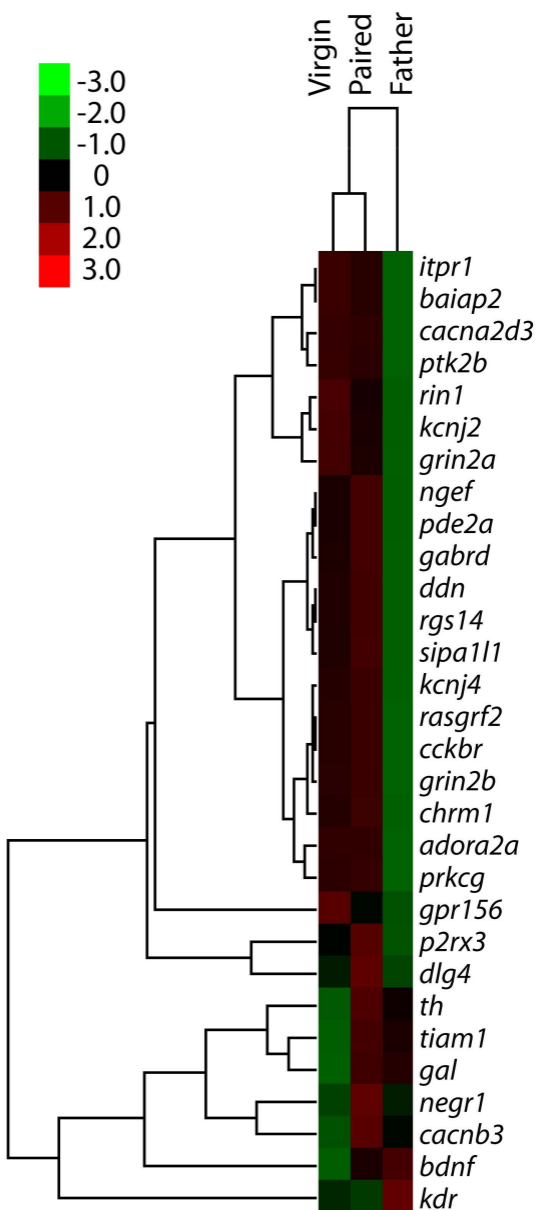

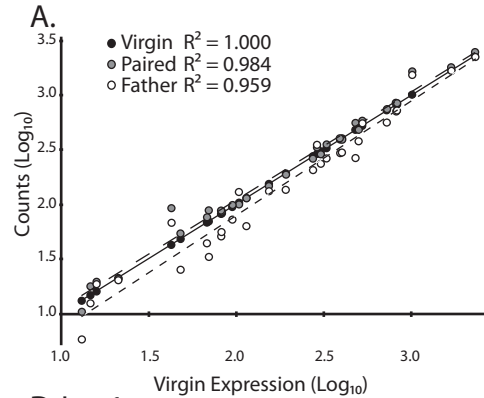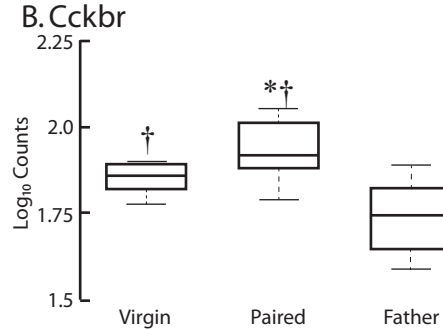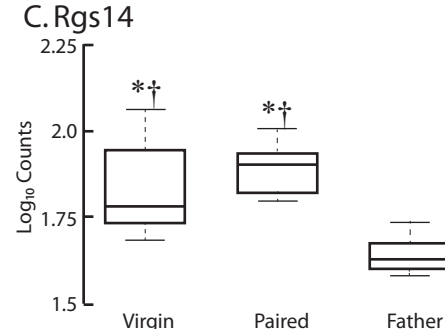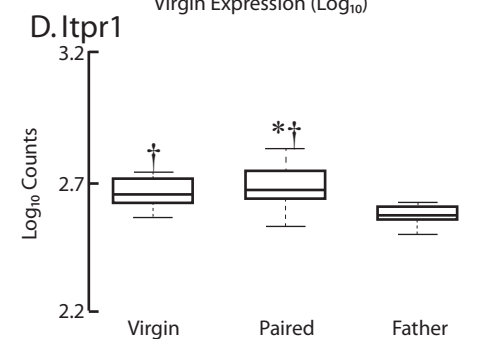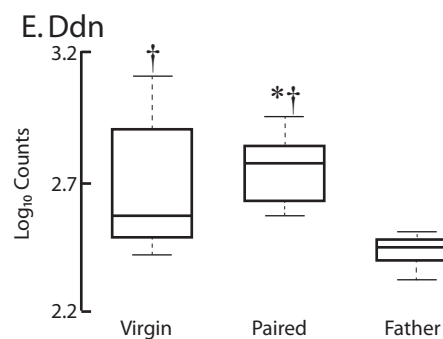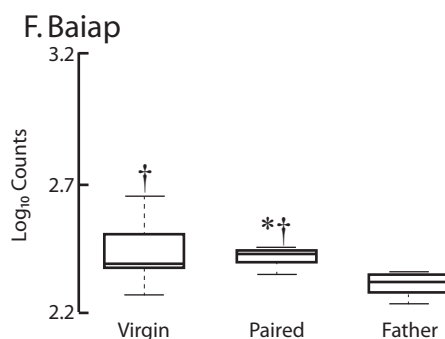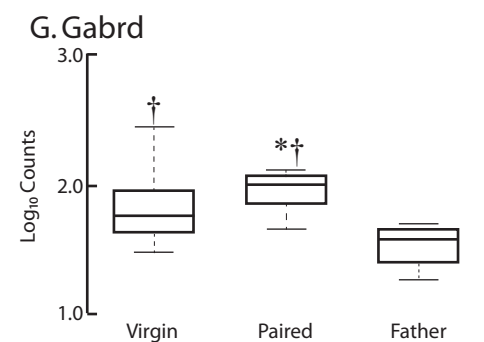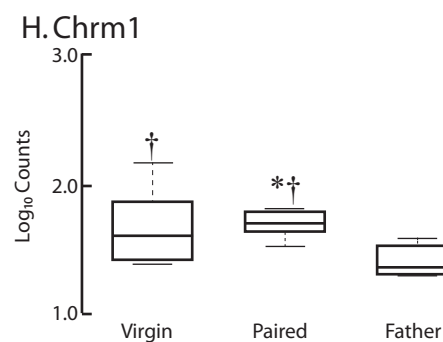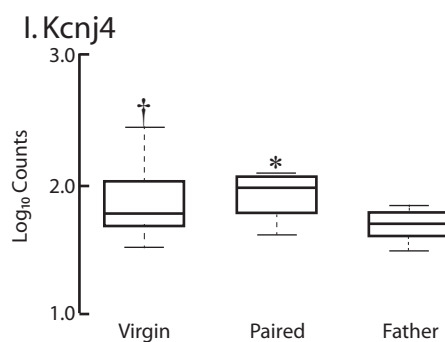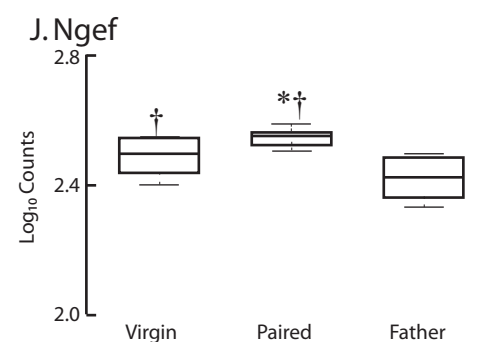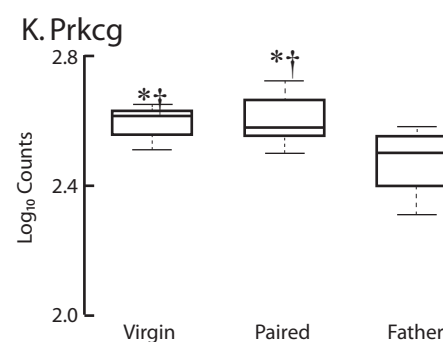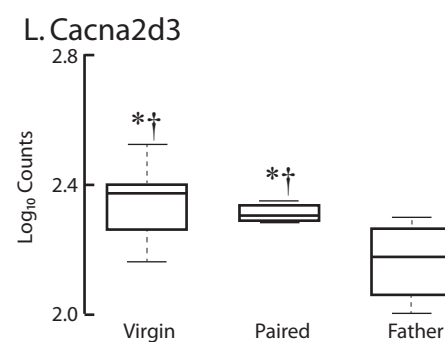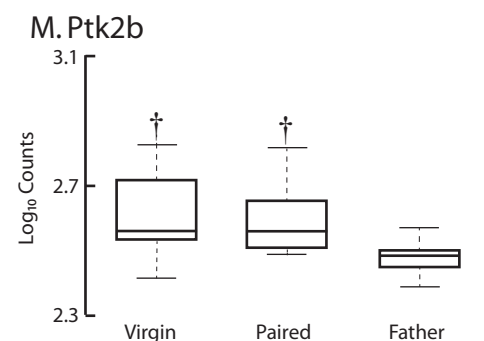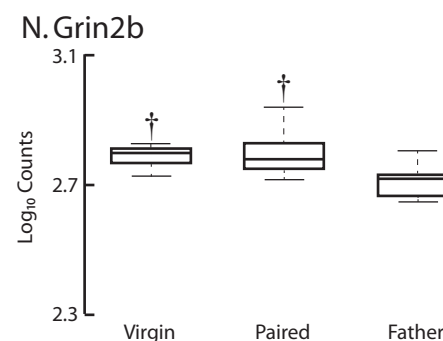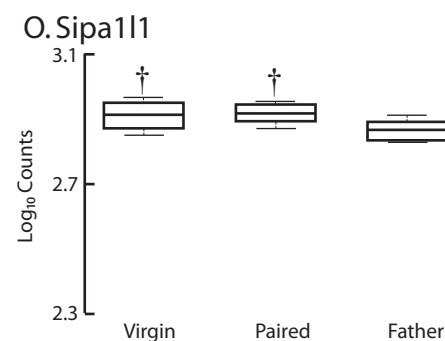

Source: https://www.biorxiv.org/content/biorxiv/early/2018/05/19/258111.full.pdf
